# Supplementary material
Source: PubMed Central journal article supplement (PMC5880109)

Raw file Scan Method Score Mass Gene names  
 20140806\_KT\_KerProt\_ECM\_1\_80 10318 ITMS; CID 125.36 1456.79 VCL

- A Q Q V S Q G L D V L T A K -

b<sub>5</sub>
b<sub>4</sub>
b<sub>7</sub>
b<sub>8</sub>
b<sub>9</sub>
b<sub>10</sub>
b<sub>11</sub>
b<sub>12</sub><sup>2+</sup>
b<sub>15</sub>

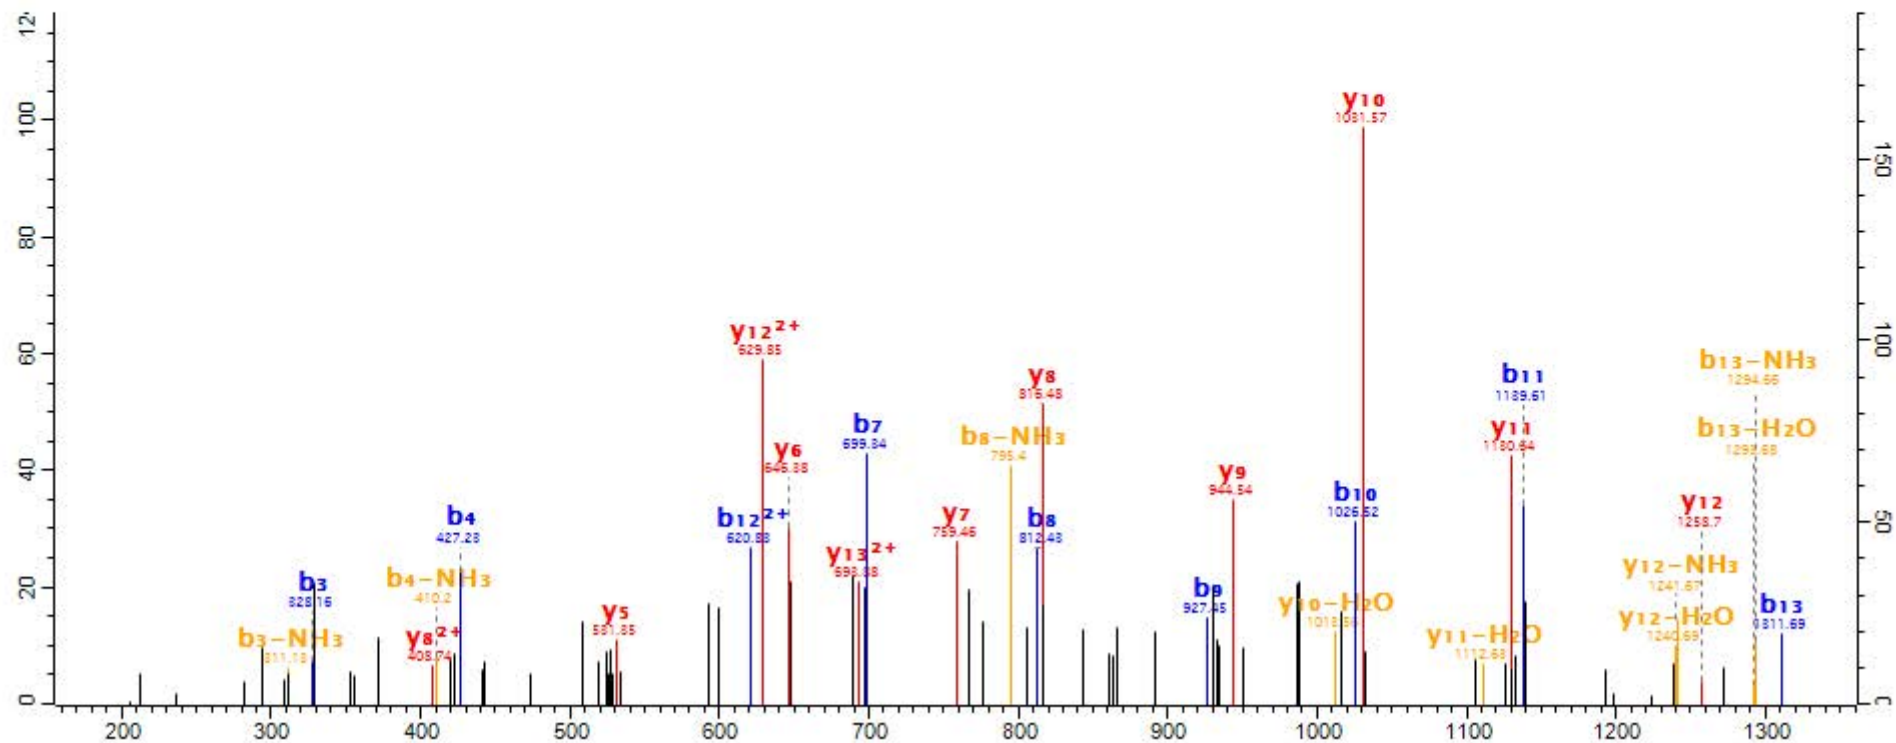

Raw file Scan Method Score Mass Gene names  
 20140806\_KT\_KerProt\_ECM\_1\_82 11642 ITMS; CID 136.83 1335.63 TXN

- T A F Q E A L D A A G D K -

A
F
Q
E
A
L
D
A
A
G
D

b<sub>3</sub>
b<sub>5</sub>
b<sub>7</sub>
b<sub>8</sub>
b<sub>9</sub>
b<sub>10</sub>
b<sub>12</sub>

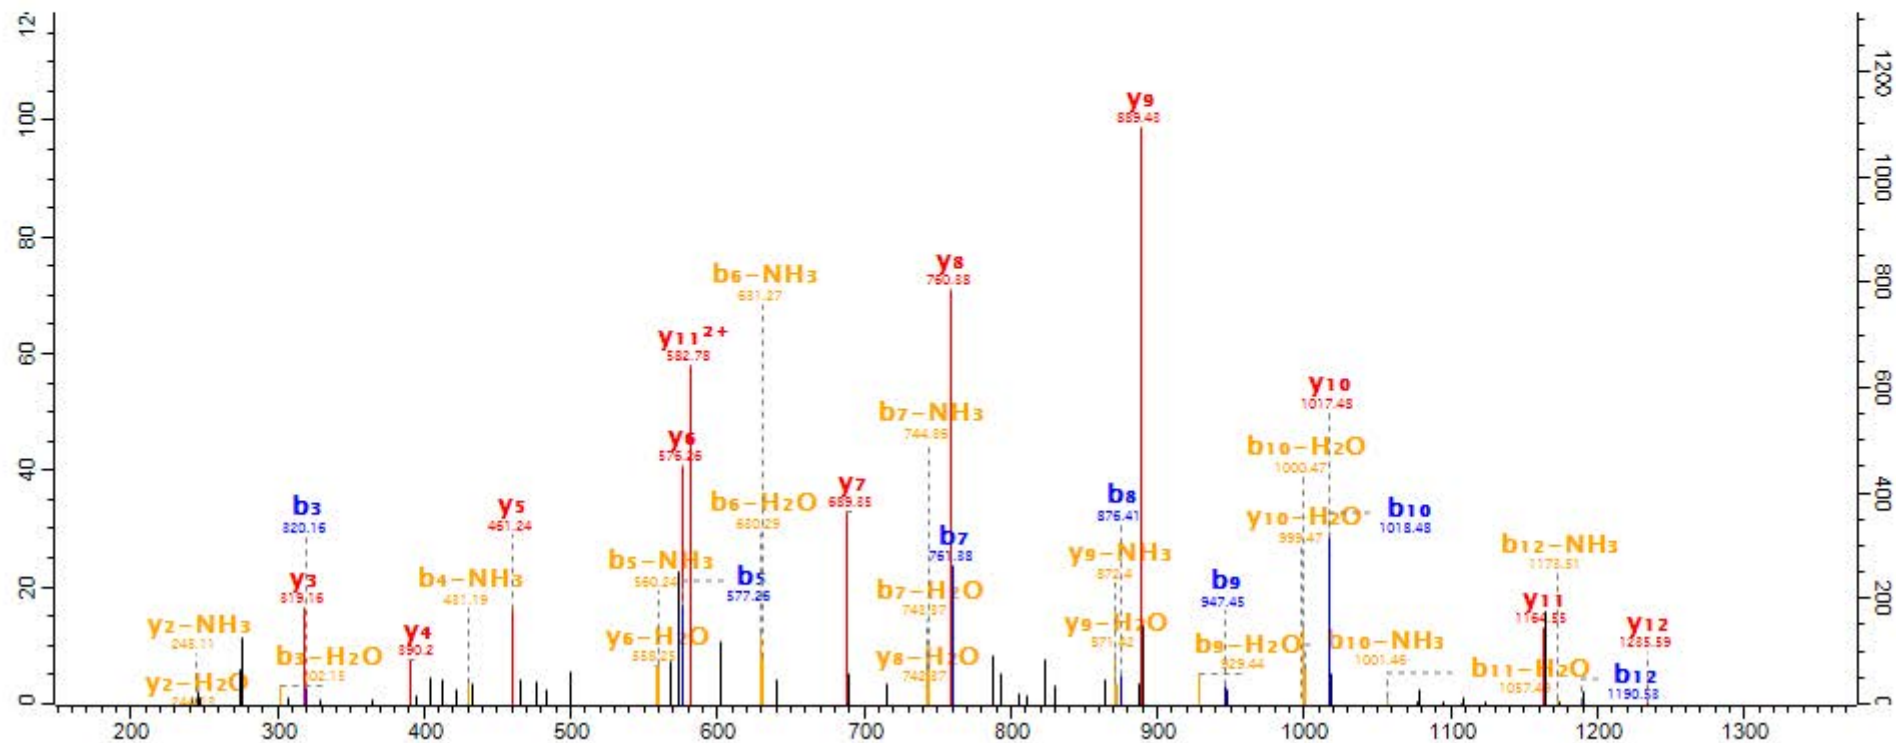

Raw file Scan Method Score Mass Gene names  
20140806\_KT\_KerProt\_ECM\_1\_86 16021 ITMS; CID 80.75 1572.88 ITGAV

- I Y I G D D N P L T L I V K -  
b2 b5 b9 b12

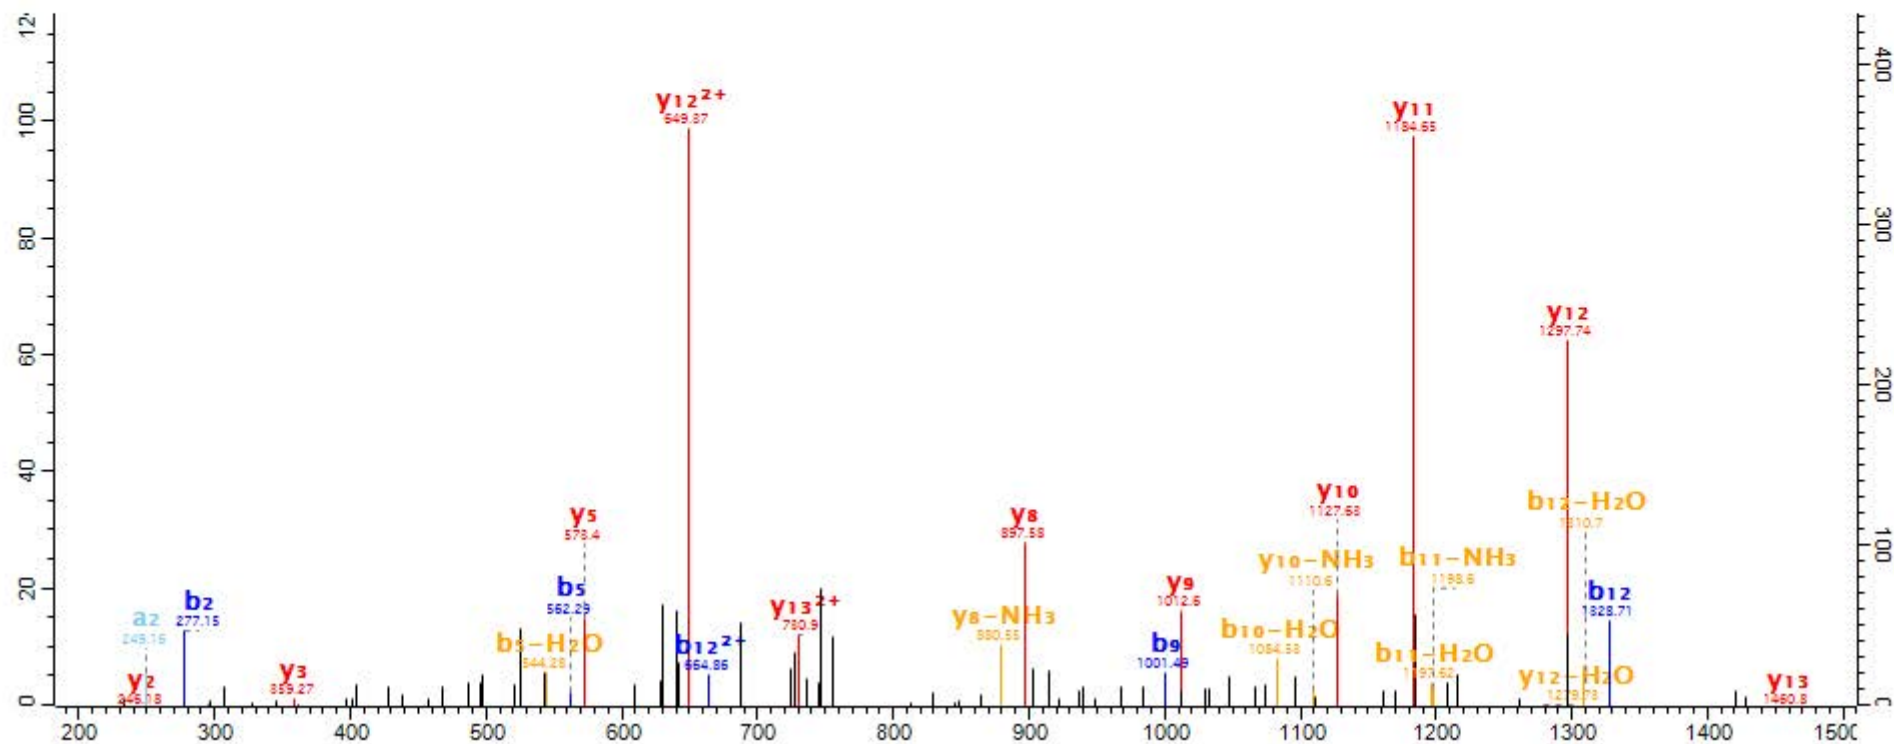

Raw file 20140806\_KT\_KerProt\_ECM\_2\_70 Scan 4102 Method ITMS; CID Score 64.07 Mass 2089.91 Gene names CDSN

\_ S S G G G S S G S S S G S S I A Q G G S A G S F K \_  
 b3 b9 b11 b14 b15<sup>2+</sup> b16 b16<sup>2+</sup> b22<sup>2+</sup> b24<sup>2+</sup>

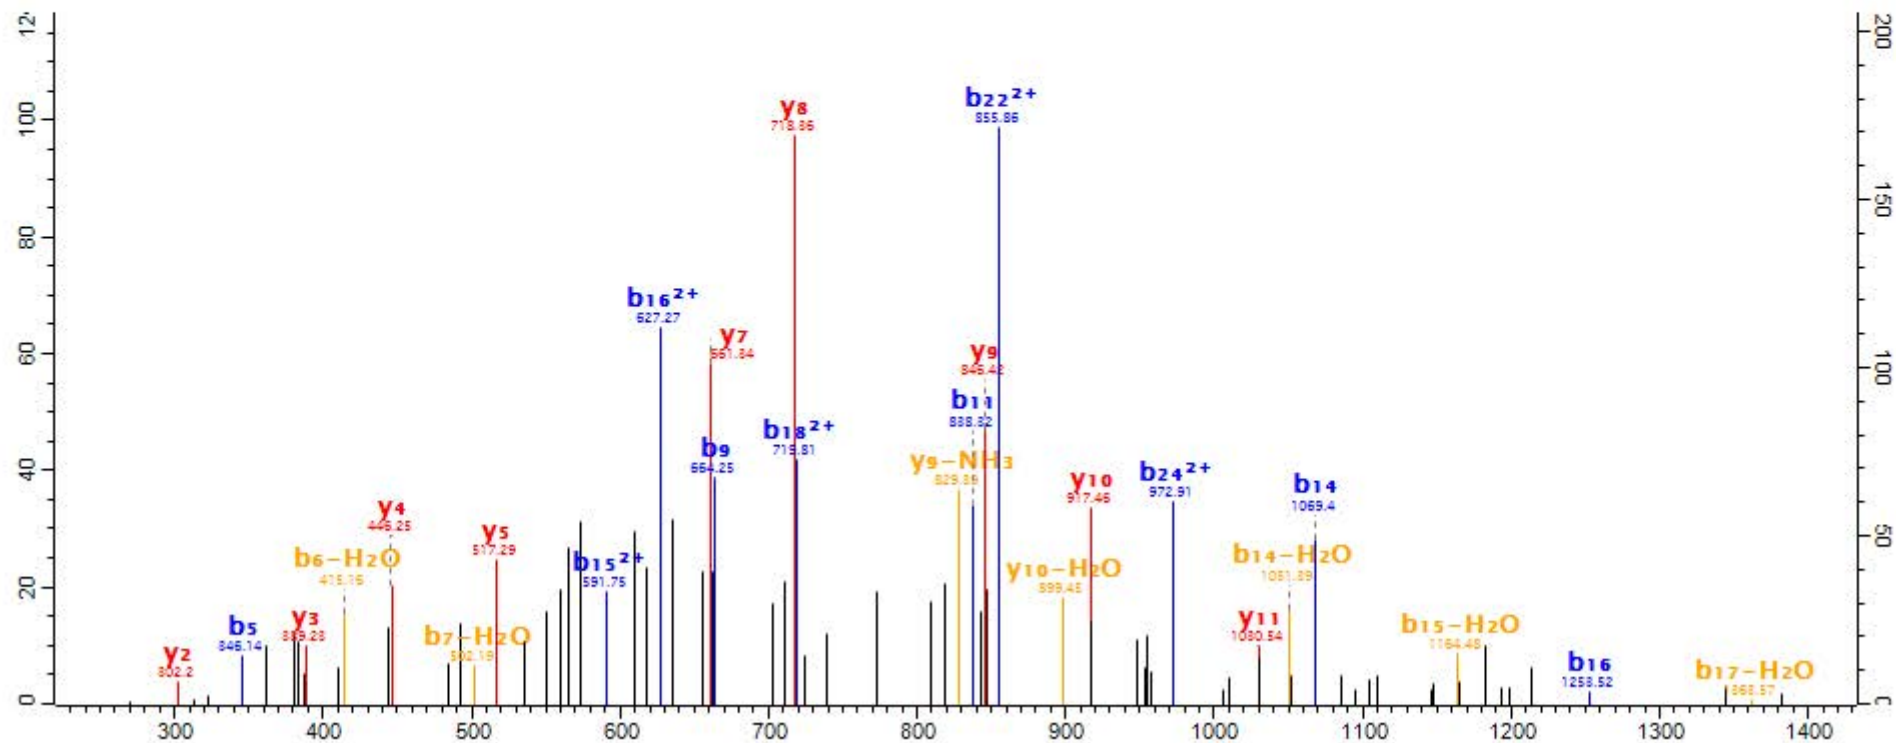

Raw file Scan Method Score Mass Gene names

- E A Q P G Q S Q V S Y Q G L P V Q K -

b6 b7 b9 b12 b13 b14 b16

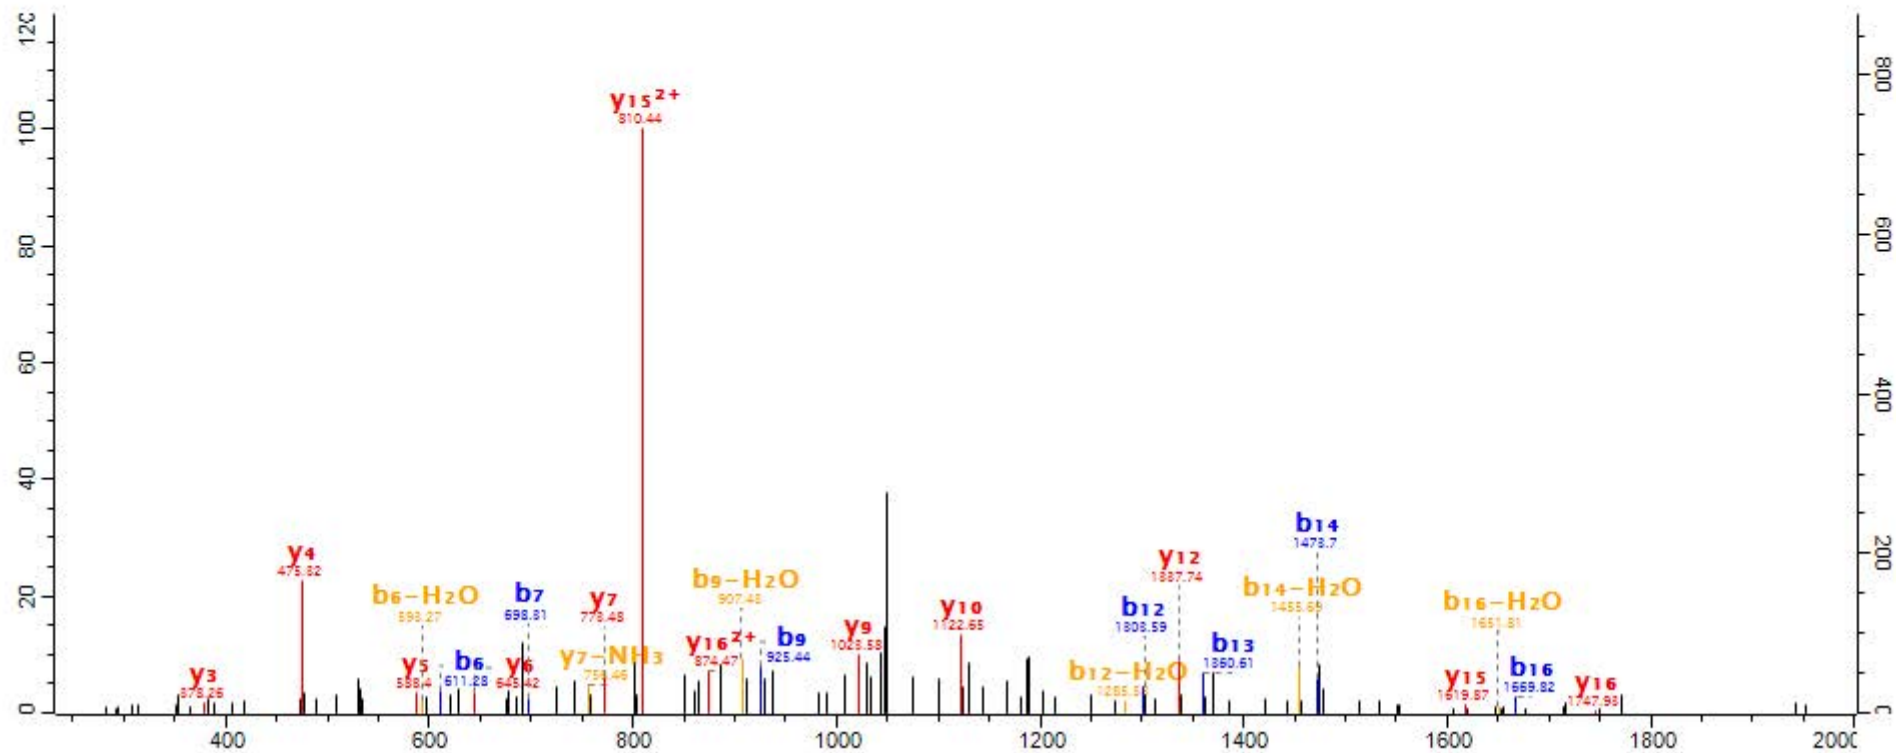

Raw file Scan Method Score Mass Gene names  
 20140806\_KT\_KerProt\_ECM\_2\_75 9676 ITMS; CID 102.08 1900.9 COL16A1

- D T Q S N E L I E I N P Q S E G K -

b8
b10
b11
b13
b14
b15

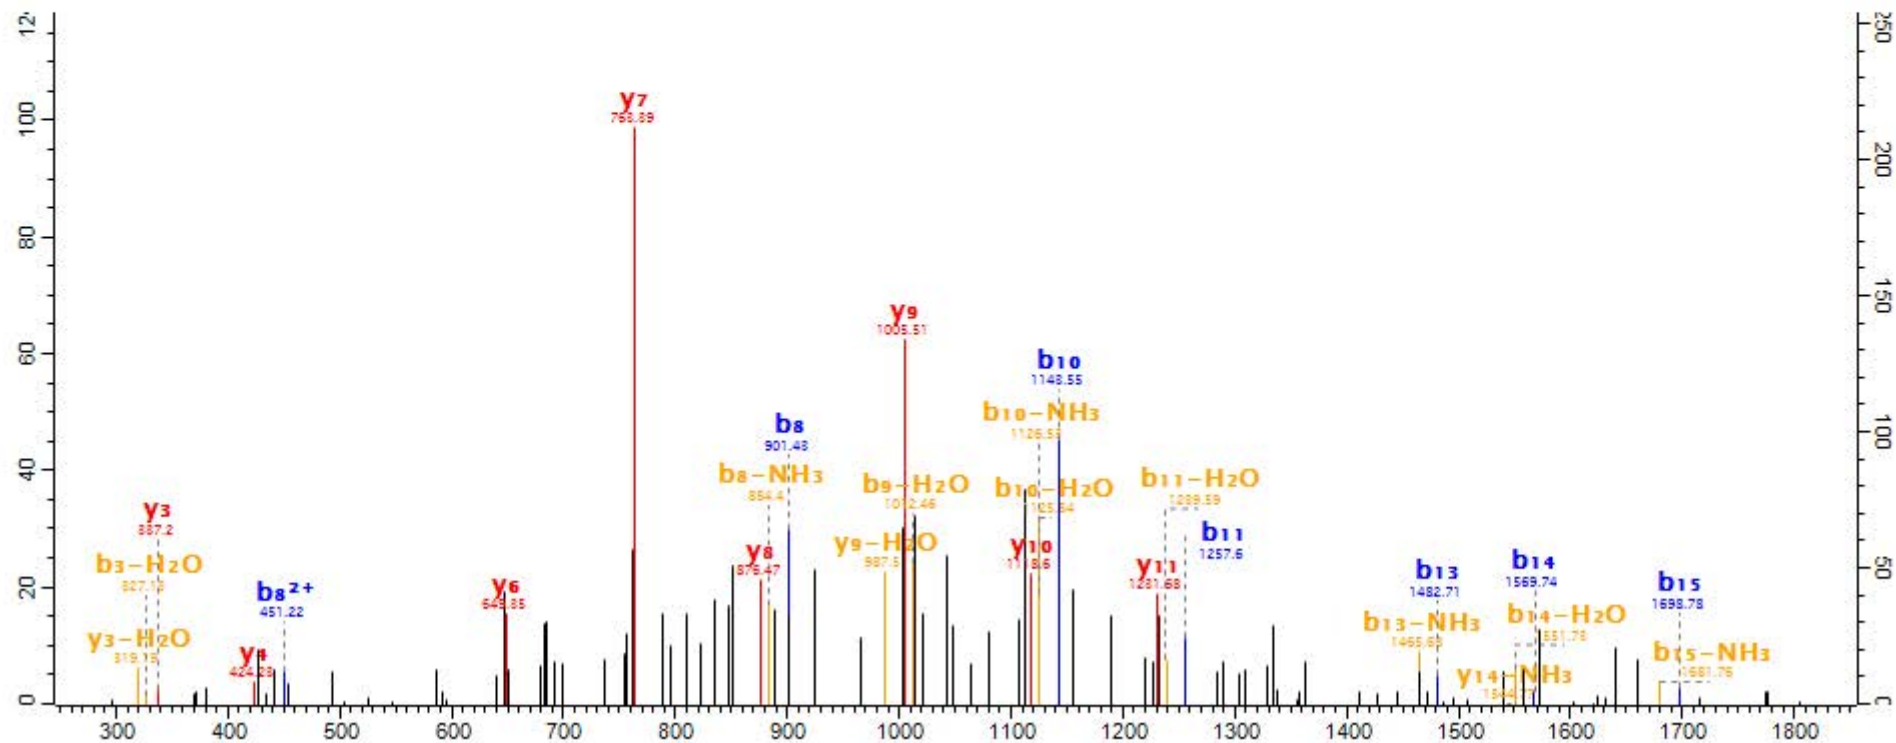



Raw file

Scan Method Score Mass Gene names

\_ T Q Q G V P A Q P A D F Q A E V E S D T R \_  
 b<sub>5</sub> b<sub>7</sub> b<sub>8</sub> b<sub>10</sub> b<sub>13</sub> b<sub>14</sub> b<sub>20</sub><sup>2+</sup>

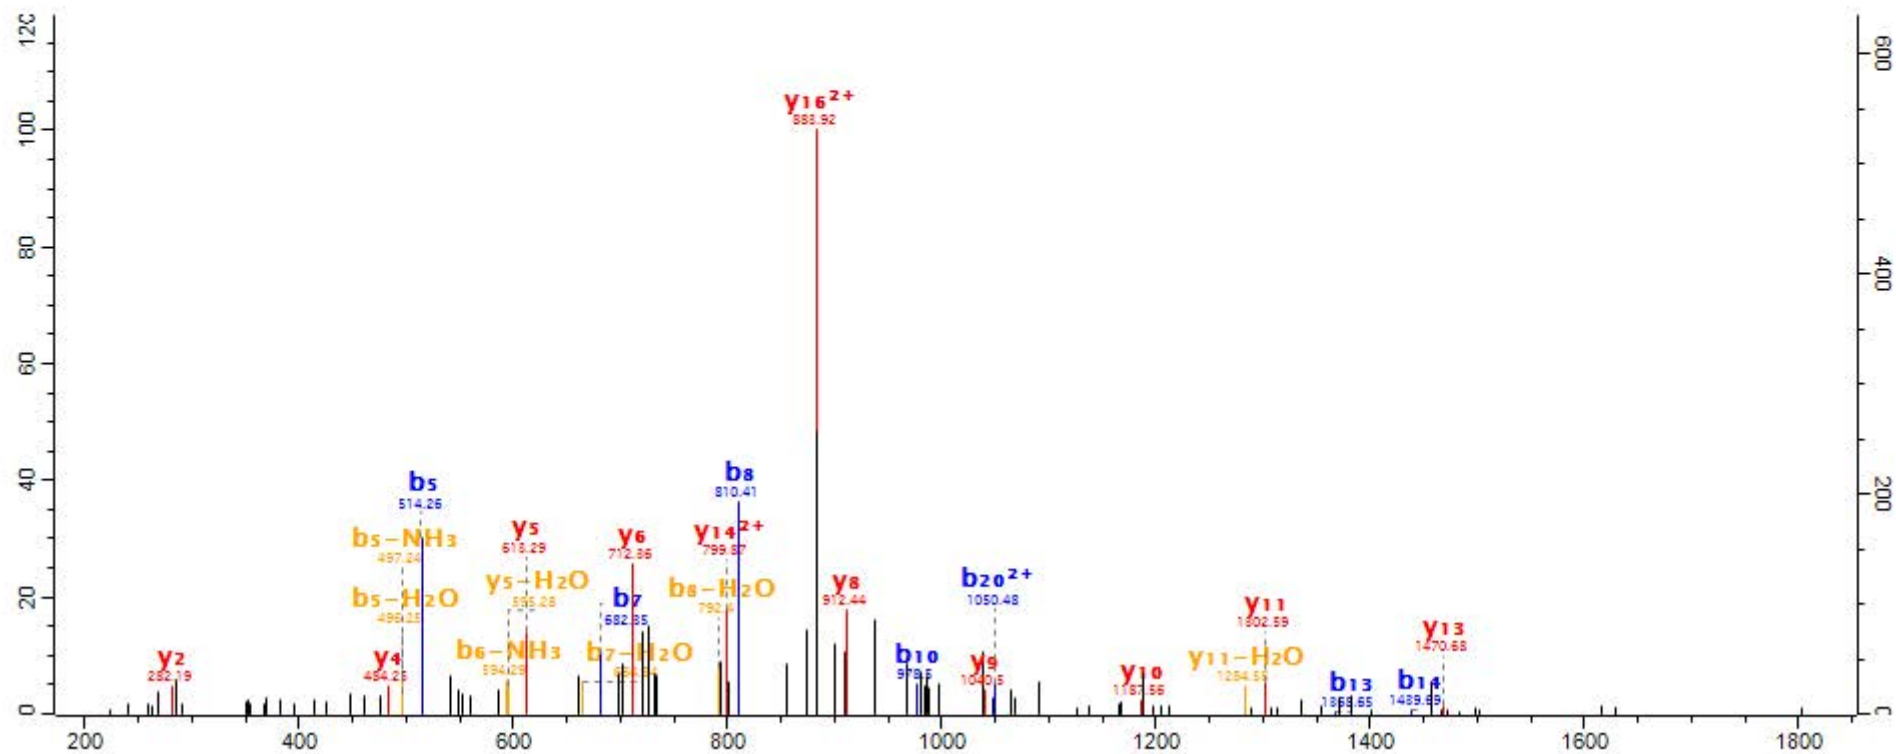

Raw file  
20140806\_KT\_KerProt\_ECM\_2\_82

Scan Method Score Mass Gene names  
4353 ITMS; CID 142.36 1029.55 LY6D

- T T N T V E P L R -  
b2 b3 b4 b5 b7<sup>2+</sup> b8

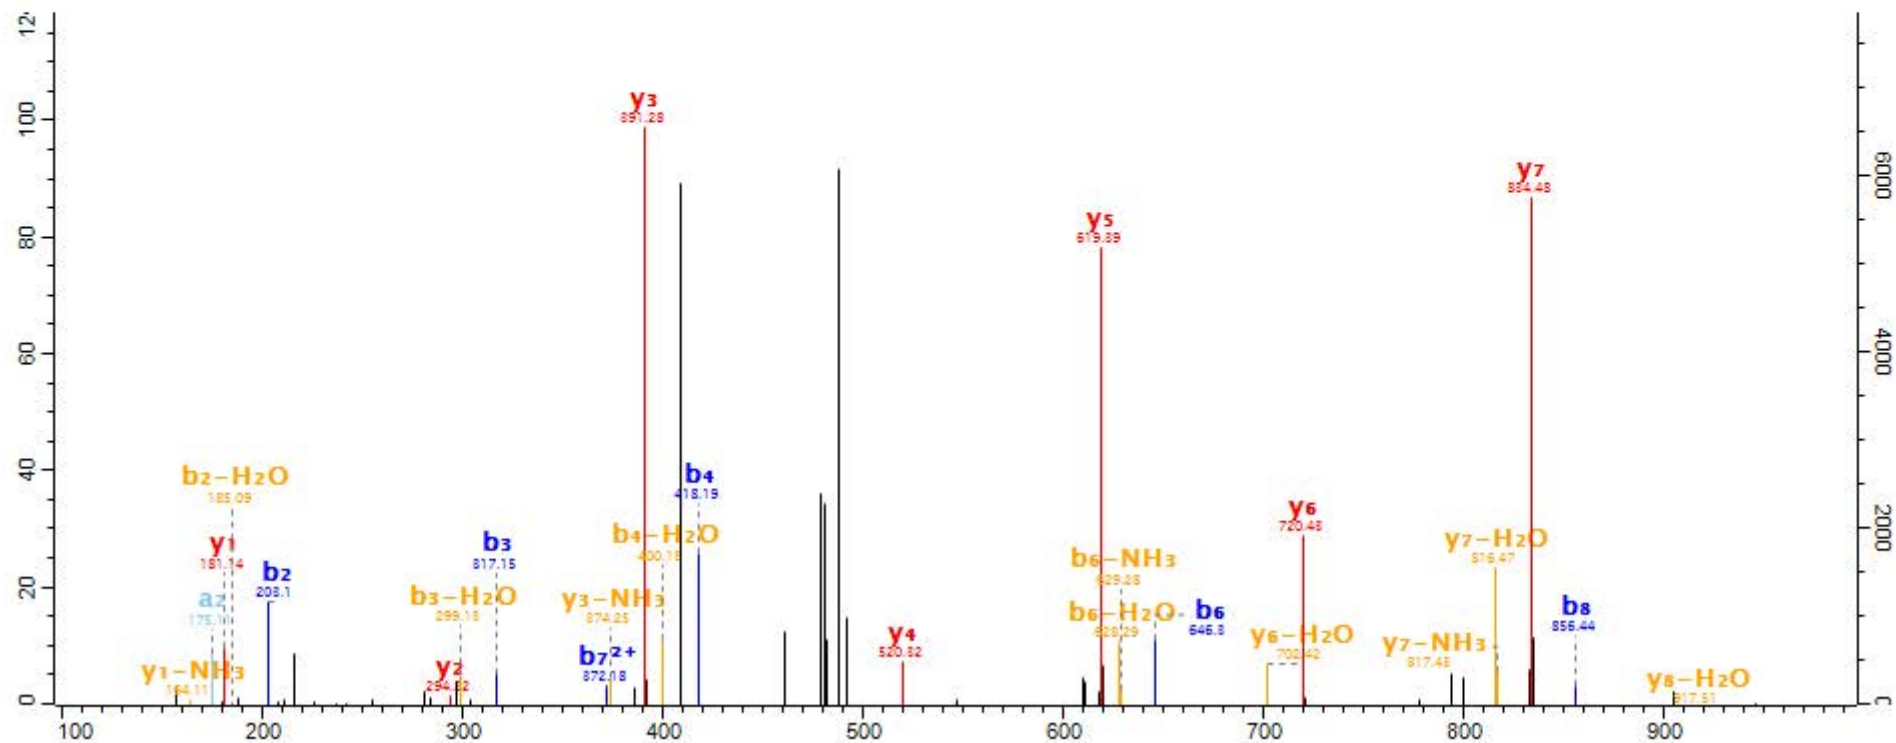



Raw file Scan Method Score Mass Gene names  
 20140806\_KT\_KerProt\_ECM\_2\_84 14104 ITMS; CID 161.82 1605.8 COL7A1

- T E F G L D A L G S G G D V I R -

b2 b5 b7 b8 b9 b10 b14 b15

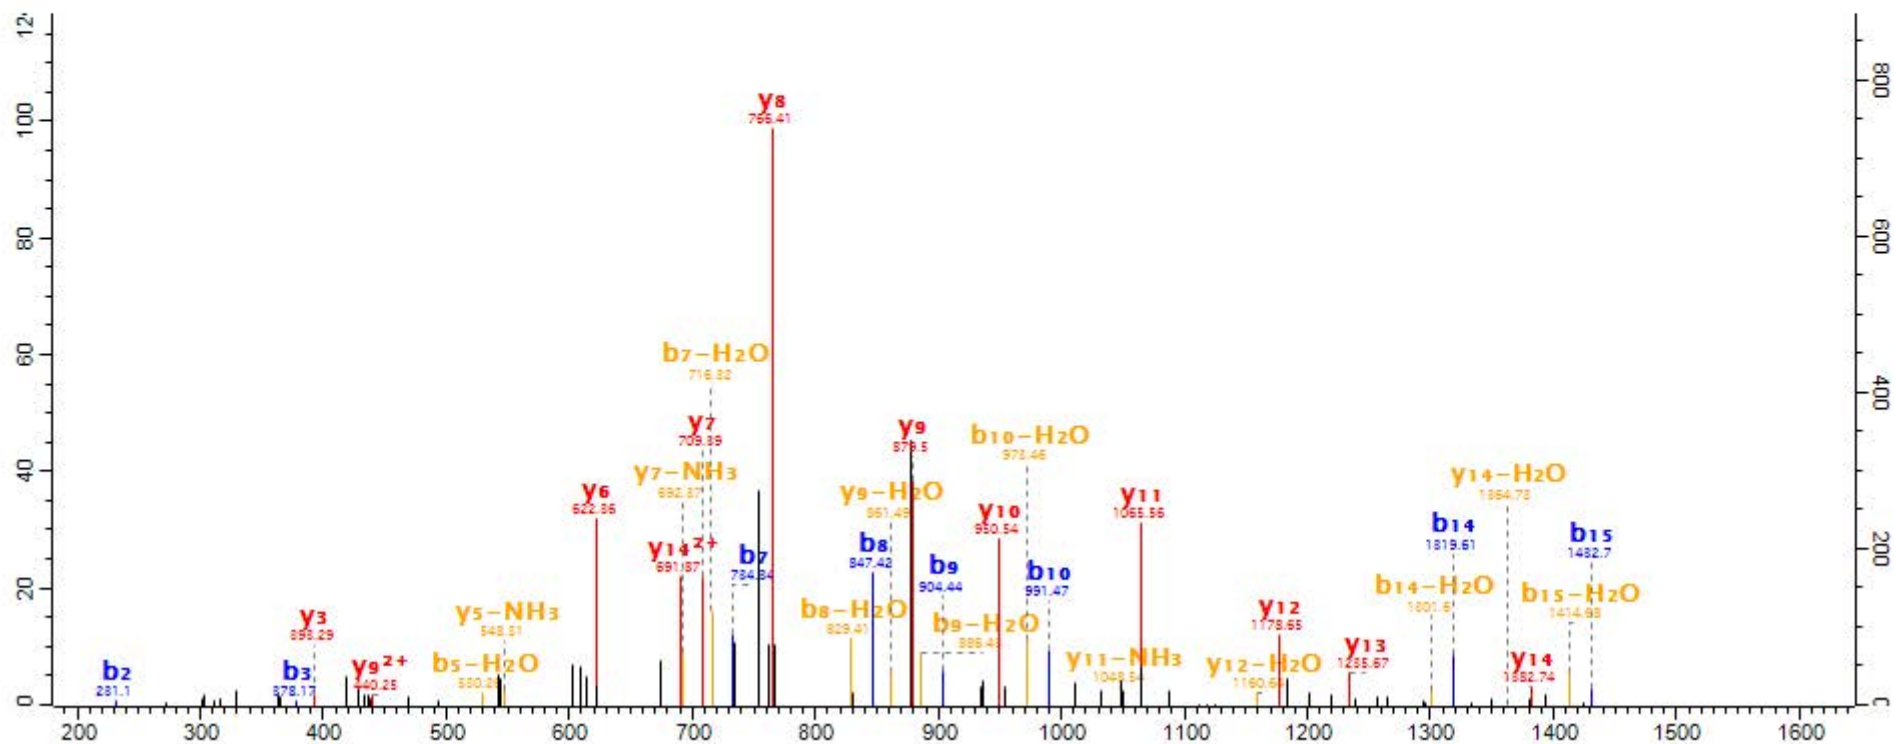

Raw file

Scan

Method

Score

Mass

Gene names

- V T S H T E L T S N Q Q S A N K -  
 b<sub>2</sub> b<sub>5</sub> b<sub>9</sub> b<sub>11</sub>

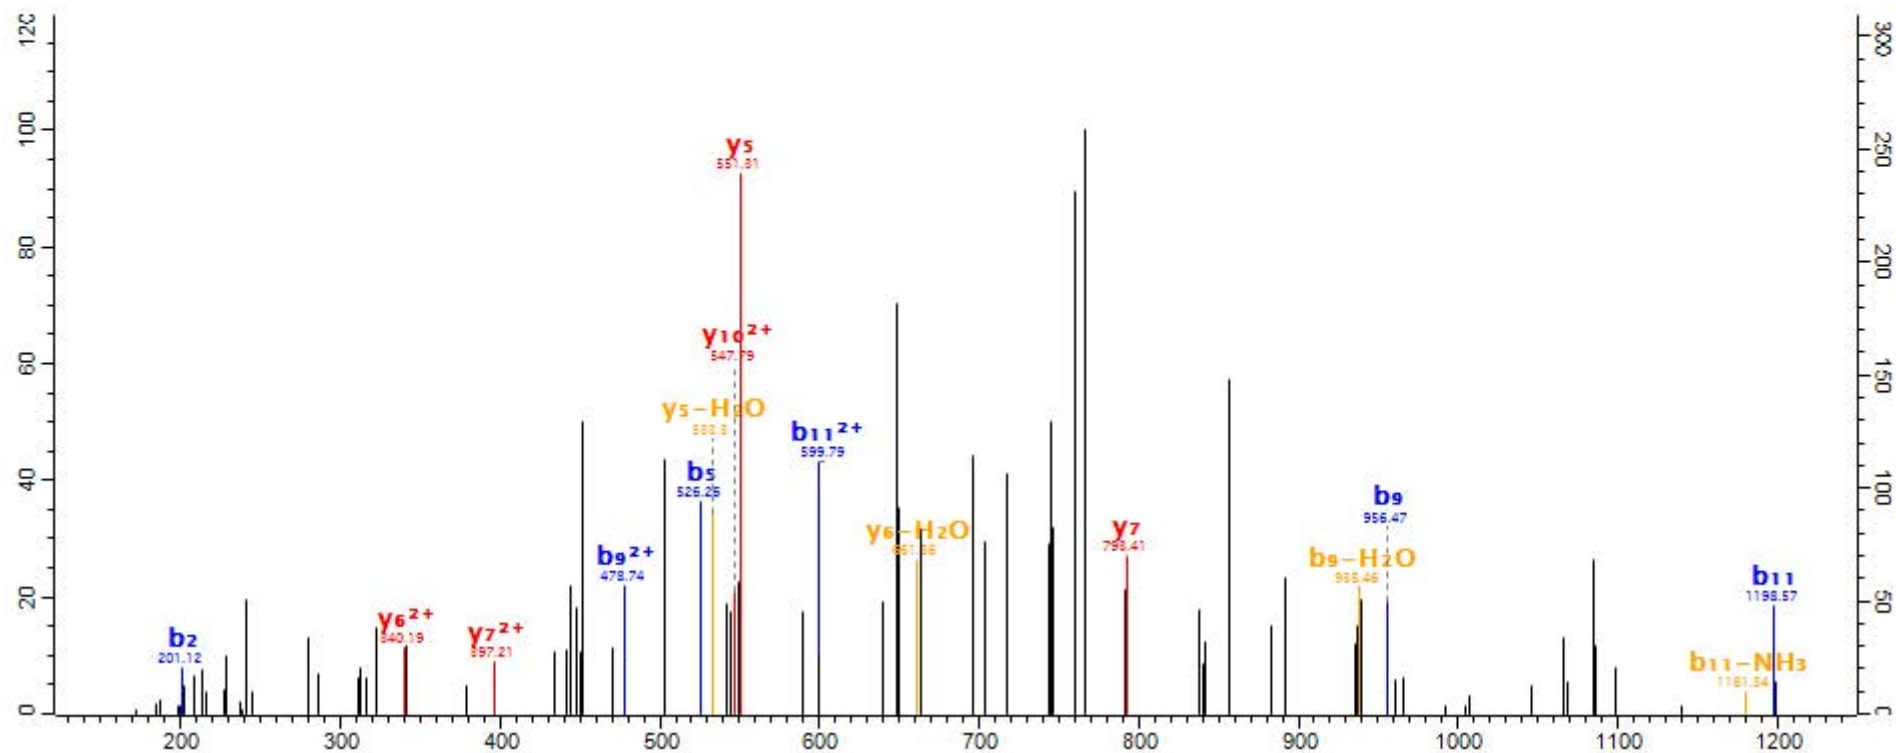

## Raw file

20140806\_KT\_KerProt\_ECM\_2\_86\_140813225457

Scan

14392

Method

ITMS; CID

Score

102.64

Mass

1659.91

Gene names

PCDH7

- L F E I D P T S G V V S L V G K -  
 b<sub>2</sub> b<sub>3</sub> b<sub>4</sub> b<sub>7</sub><sup>2+</sup> b<sub>8</sub> b<sub>10</sub> b<sub>11</sub> b<sub>14</sub>

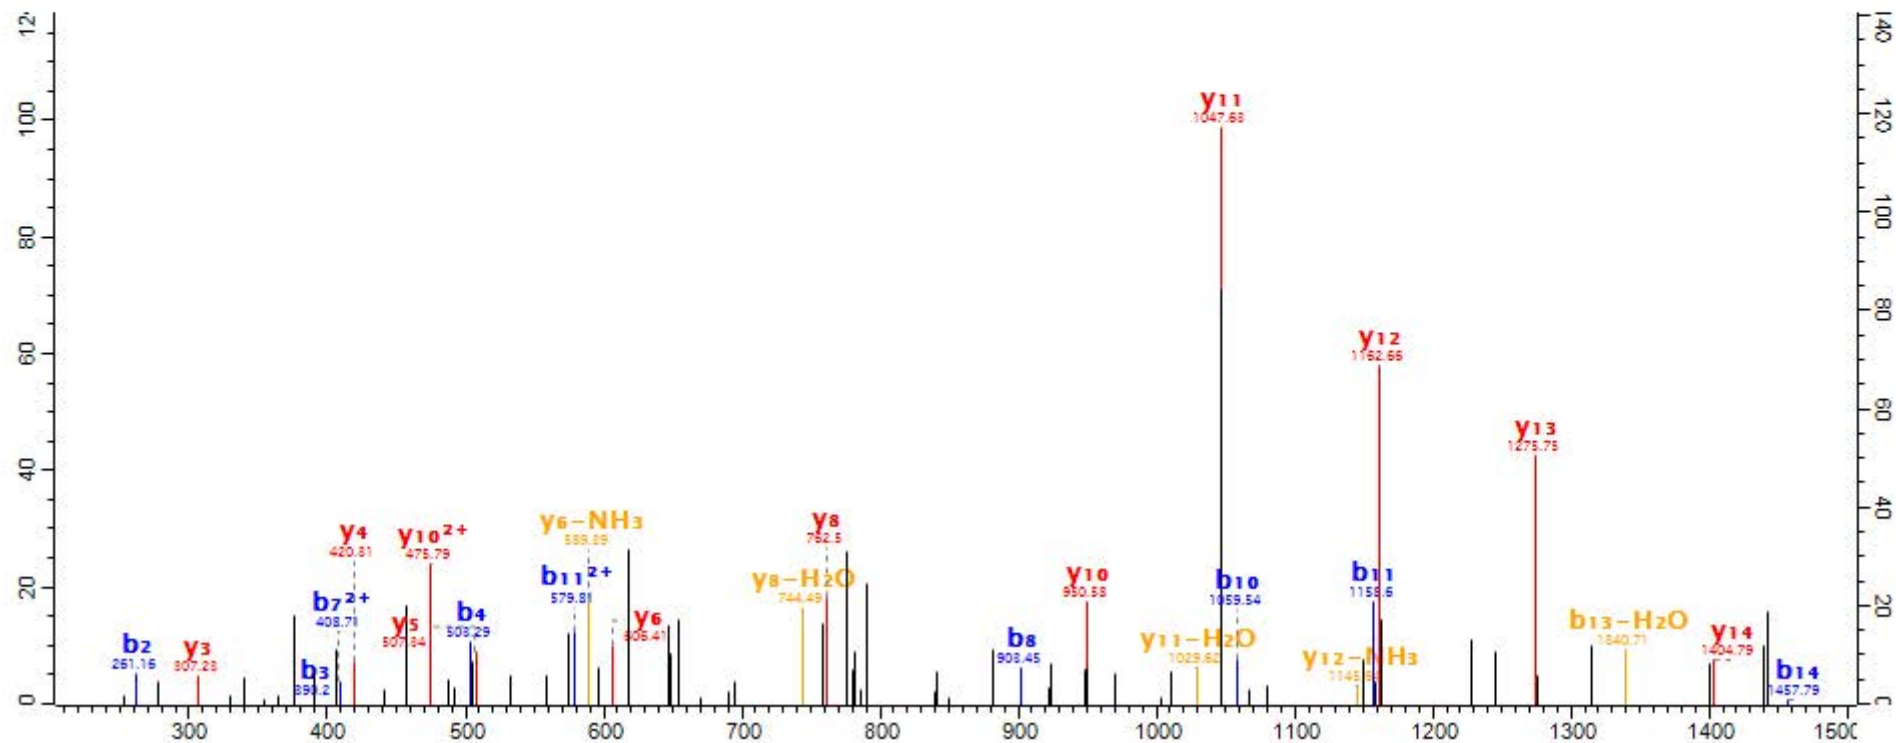

Raw file Scan Method Score Mass Gene names  
20140806\_KT\_KerProt\_ECM\_2\_90 8822 ITMS; CID 117.09 1170.65 ITIH4

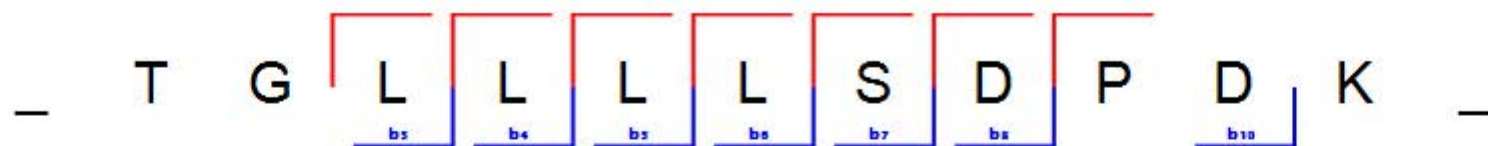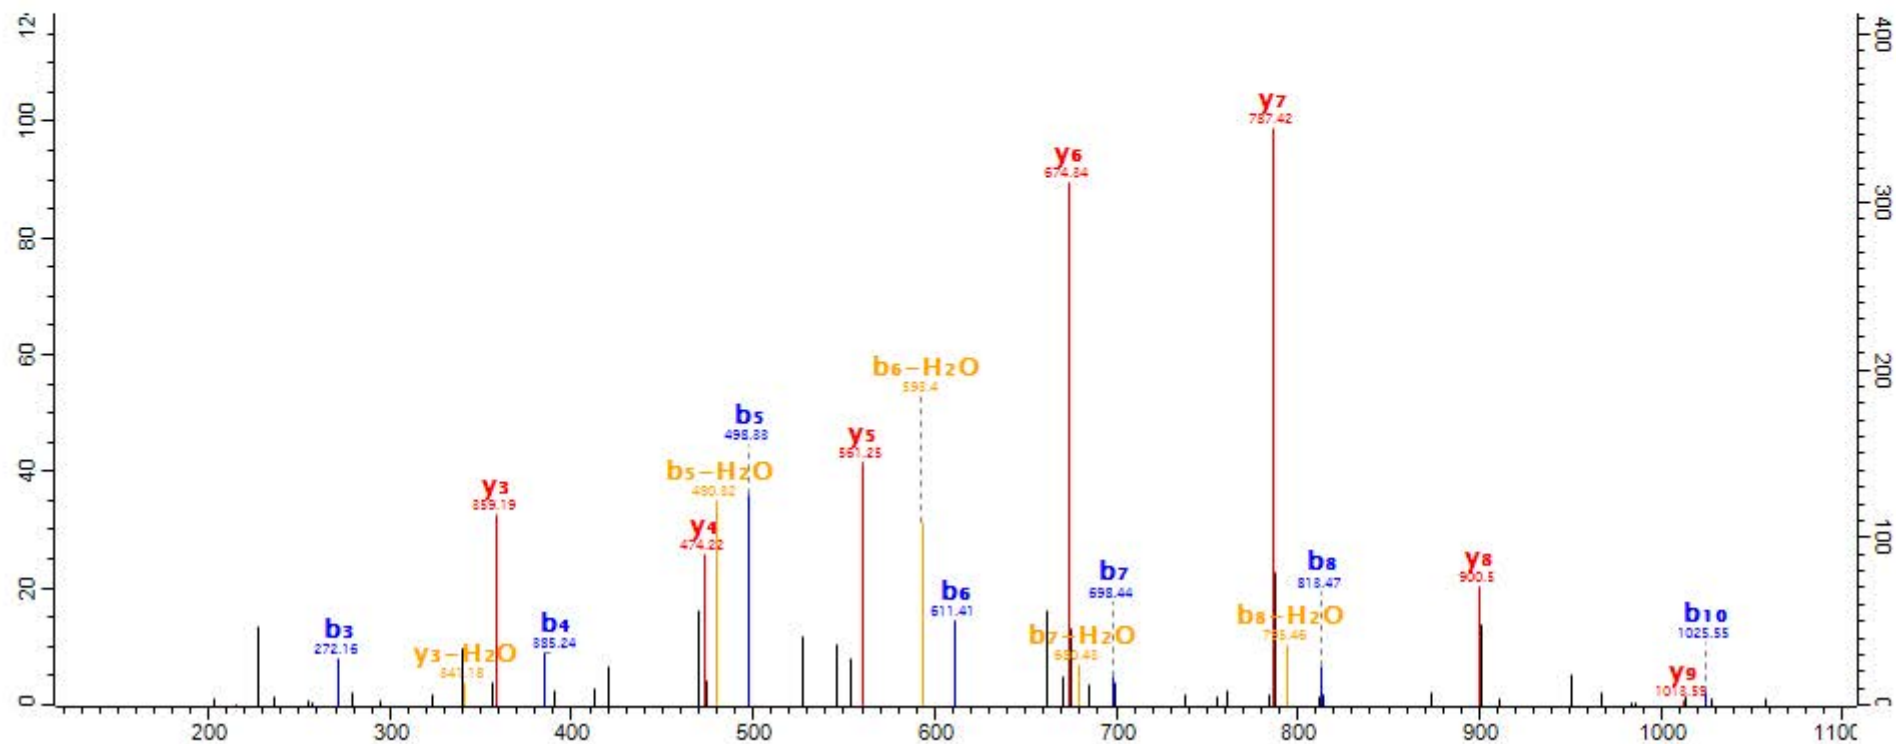

## Raw file

20140806\_KT\_KerProt\_ECM\_3\_75\_140813121432

Scan Method Score Mass Gene names

4886 ITMS; CID 72.8 2134.96 IGKC

- V D N A L Q S G N S Q E S V T E Q D S K -  
 b5 b9 b12 b17 b18

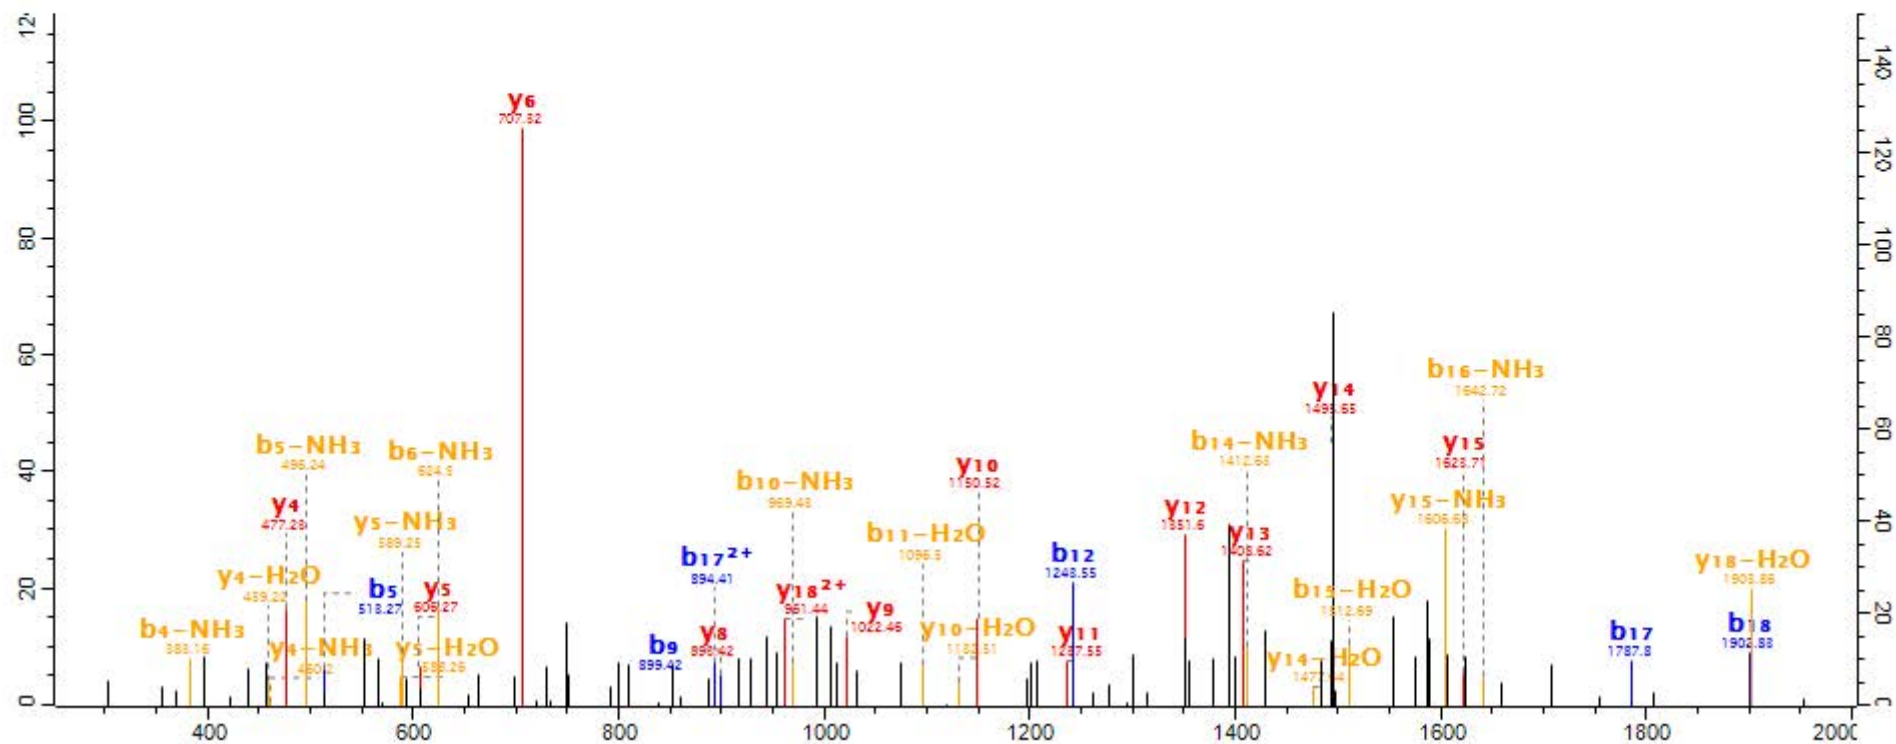

Raw file

20140806\_KT\_KerProt\_ECM\_3\_82

Scan Method

8119 ITMS; CID

Score

184.96

Mass

1431.74

Gene names

PRSS3

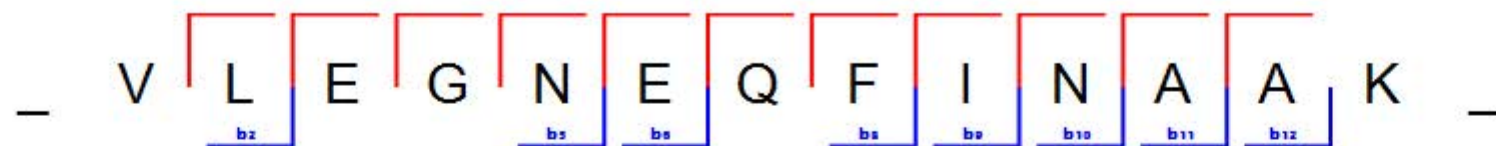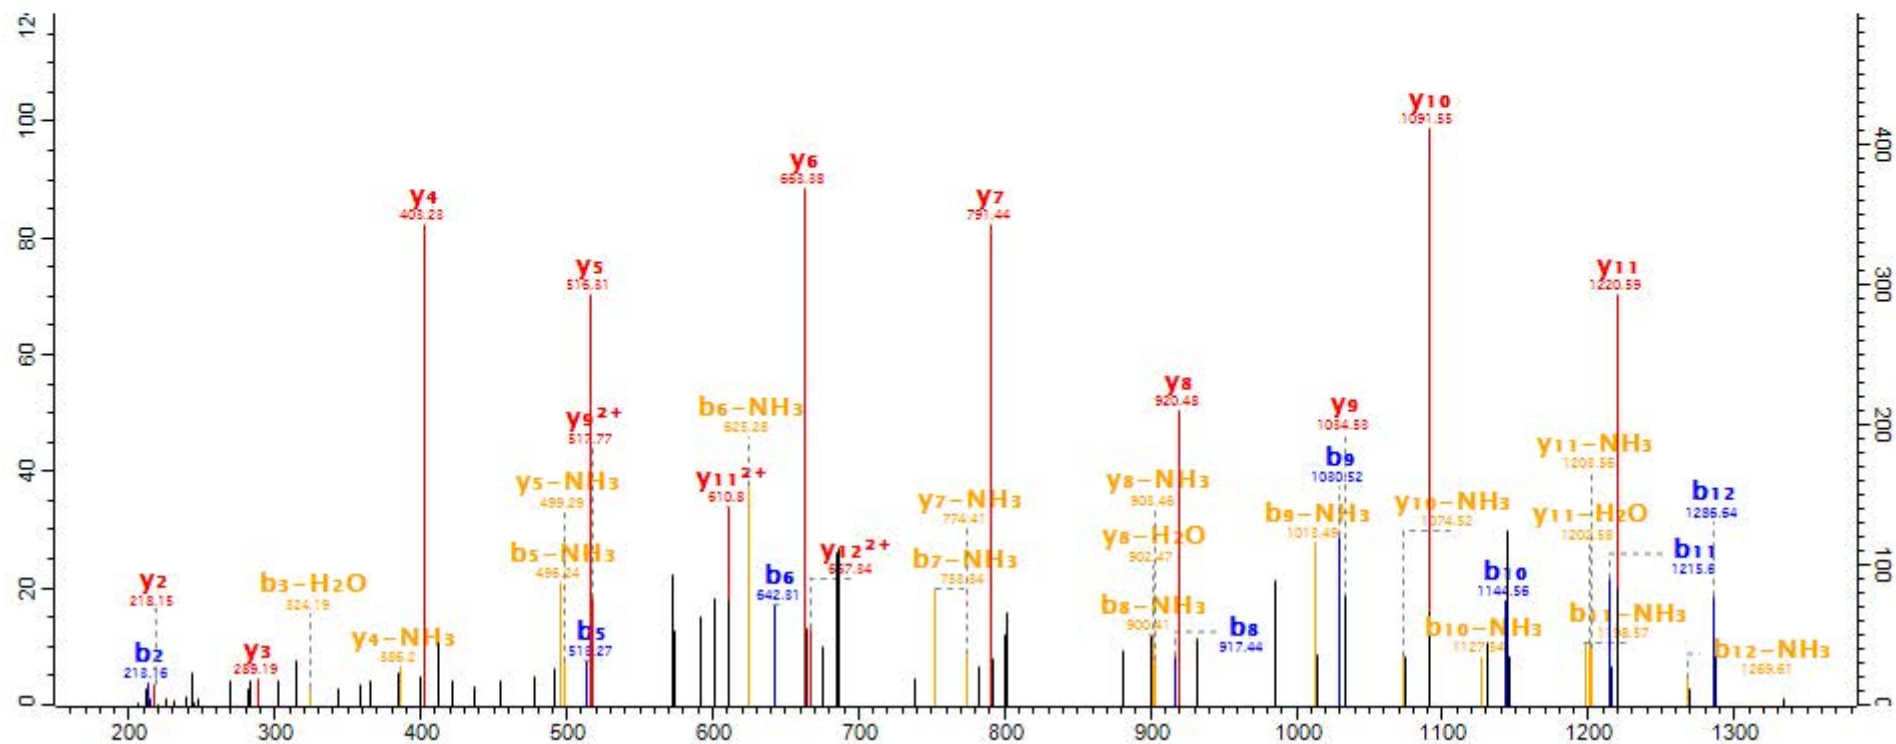



Raw file 20140806\_KT\_KerProt\_ECM\_3\_84 Scan 13123 Method ITMS; CID 142.76 Mass 1255.61 Gene names S100A7

- G T N Y L A D V F E K -

N
Y
L
A
D
V
F
E

b<sub>3</sub>
b<sub>4</sub>
b<sub>5</sub>
b<sub>8</sub>
b<sub>9</sub>
b<sub>10</sub>

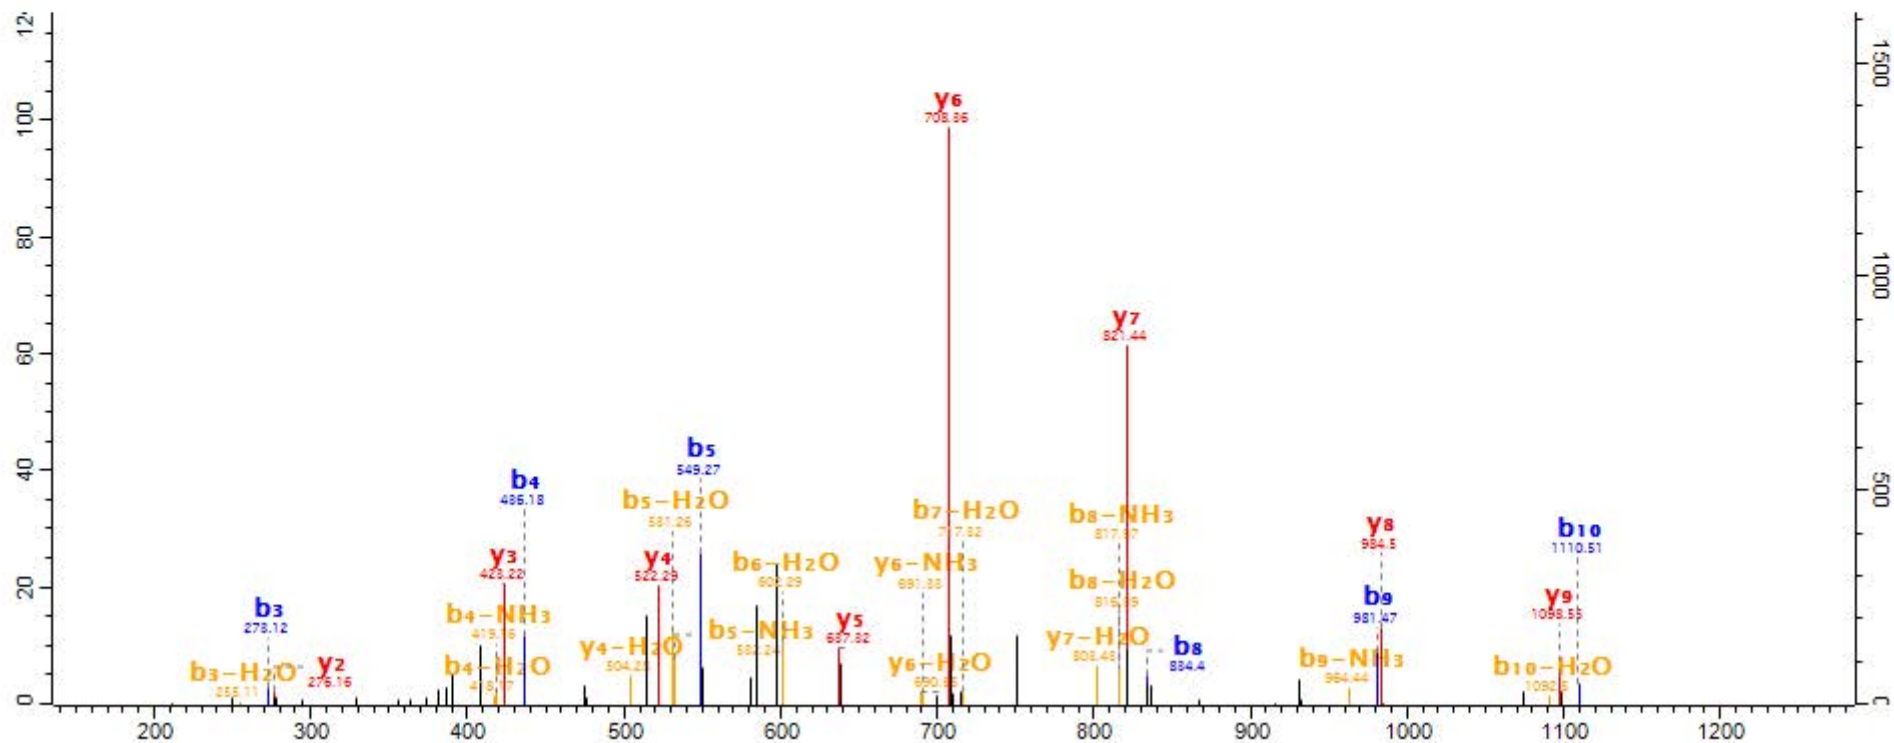

Raw file Scan Method Score Mass Gene names  
 20140806\_KT\_KerProt\_ECM\_4\_80 7393 ITMS; CID 105.17 1654.8 GPI

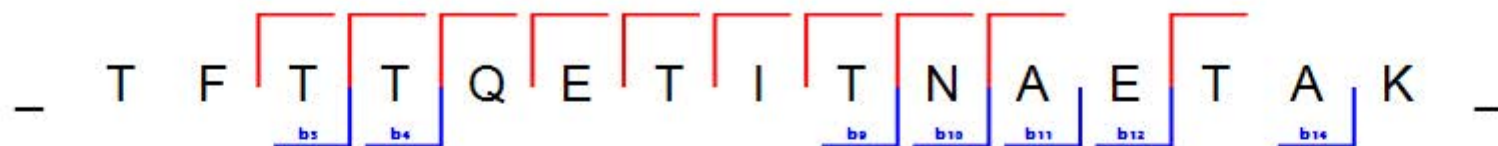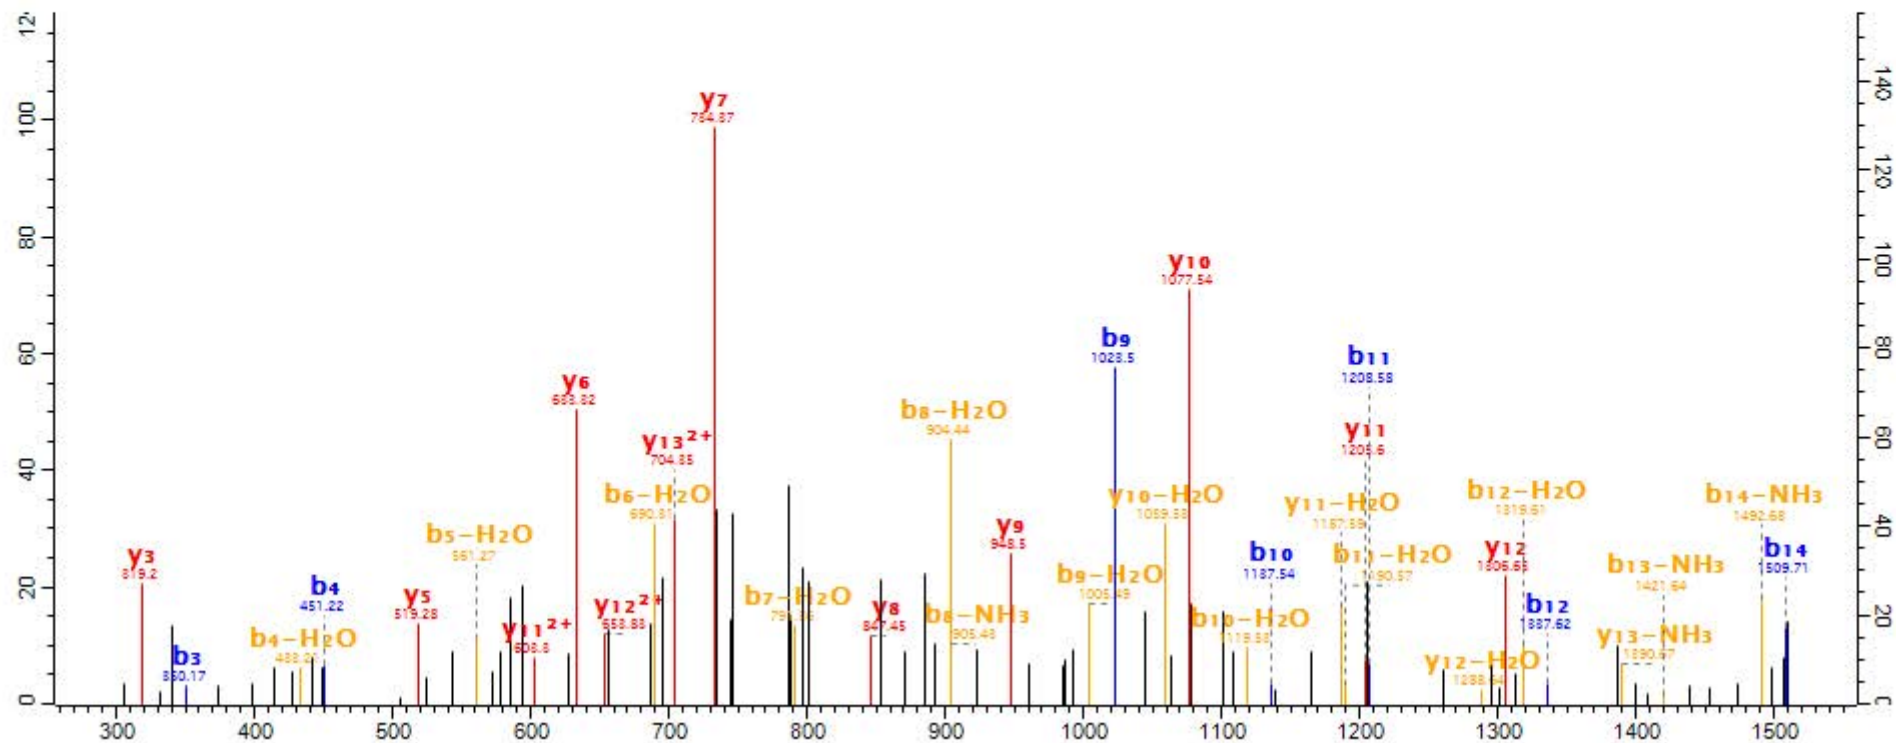

Raw file Scan Method Score Mass Gene names  
20140806\_KT\_KerProt\_ECM\_4\_82 7104 ITMS; CID 86.19 1271.66 RTN3

- T Q I D H Y V G I A R -  
          b<sub>2</sub>                  b<sub>5</sub>  b<sub>5</sub>                  b<sub>5</sub>

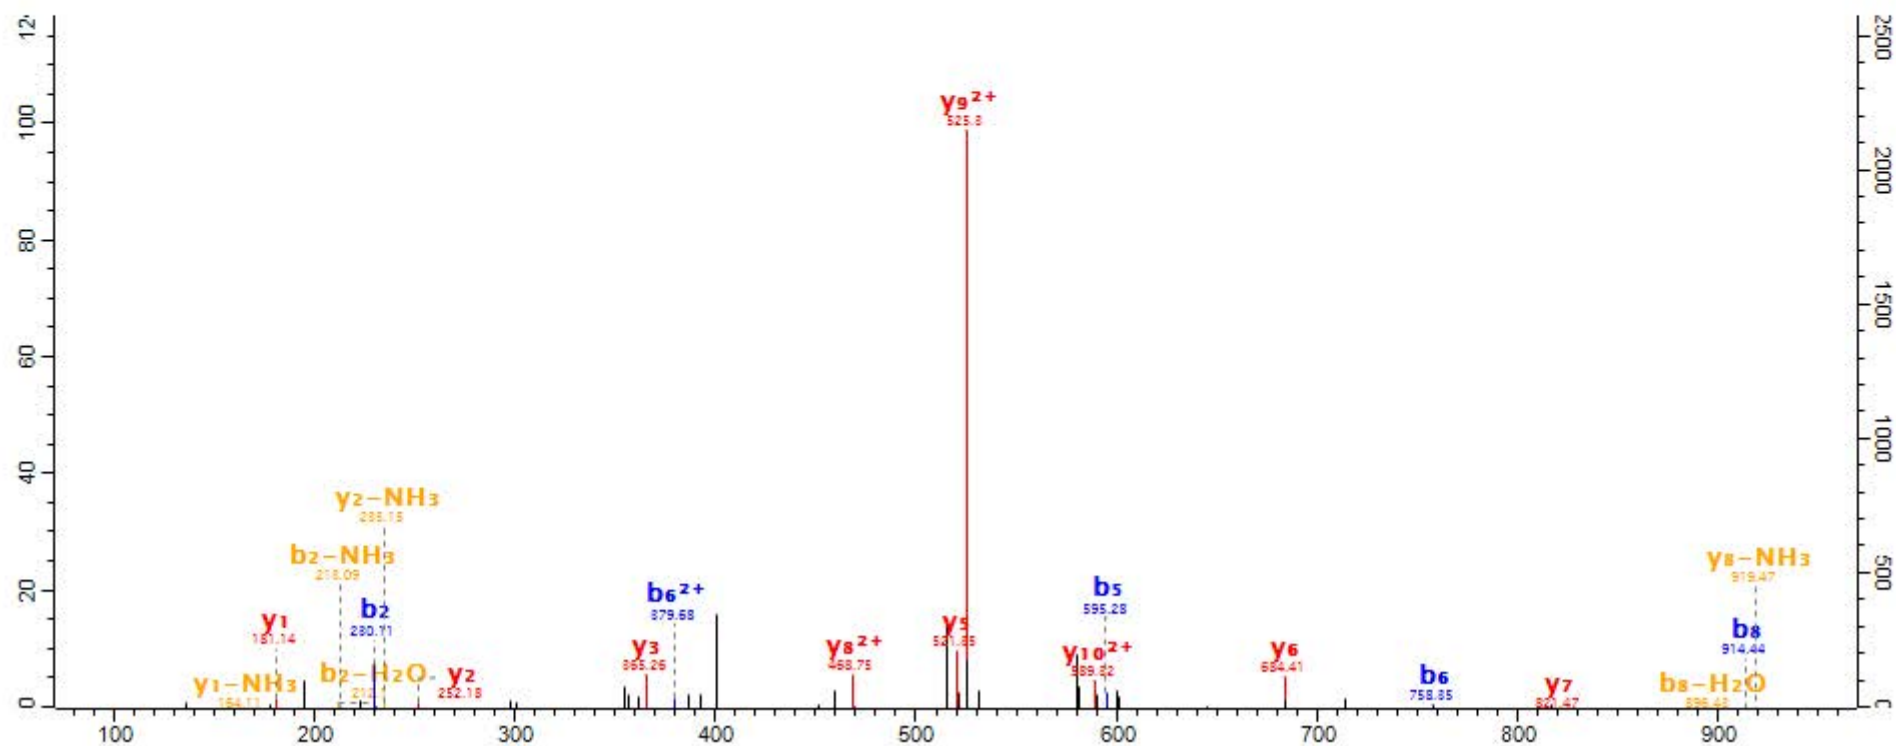

Raw file 20140806\_KT\_KerProt\_ECM\_4\_84 Scan 14187 Method ITMS; CID 135.55 Mass 1872.98 Gene names CLU

- L F D S D P I T V T V P V E V S R -

b2 b5 b7 b8 b9 b10 b11 b15 b16

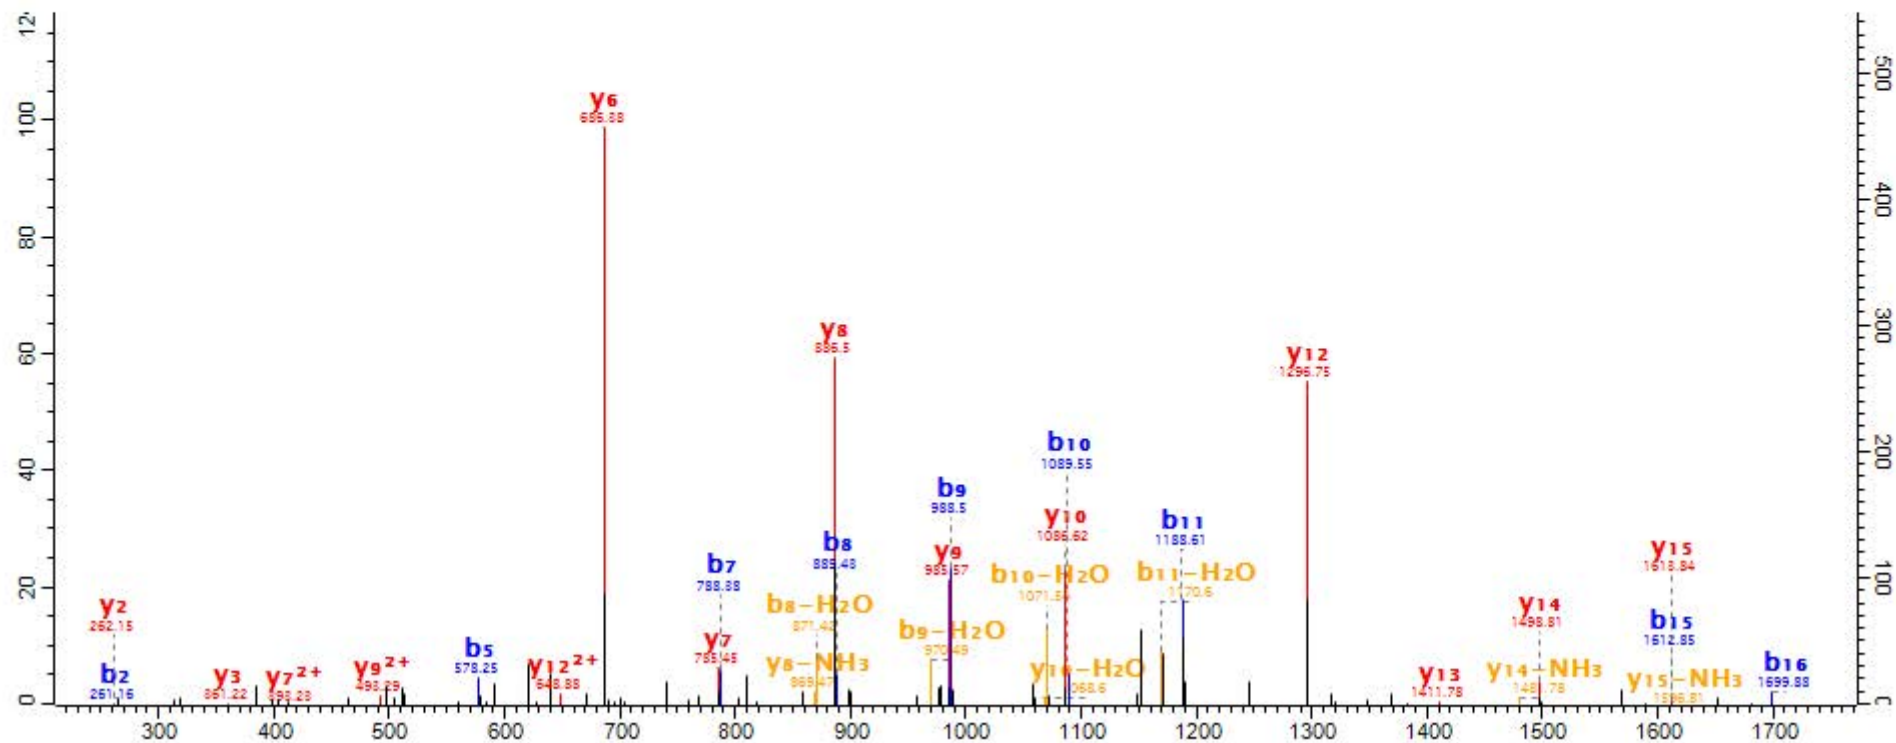

Raw file Scan Method Score Mass Gene names  
 20140820\_KT\_KerProt\_ECM\_2\_82 9773 ITMS; CID 145.29 1288.66 APOO

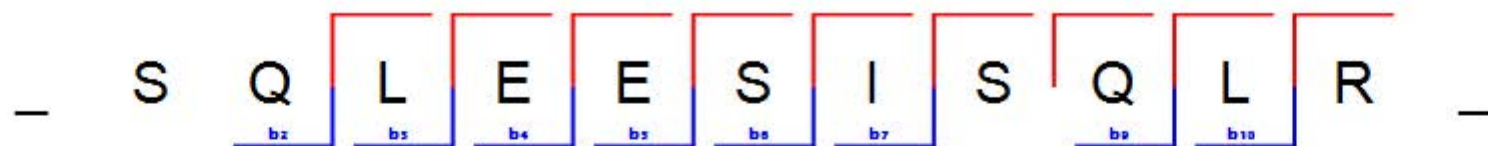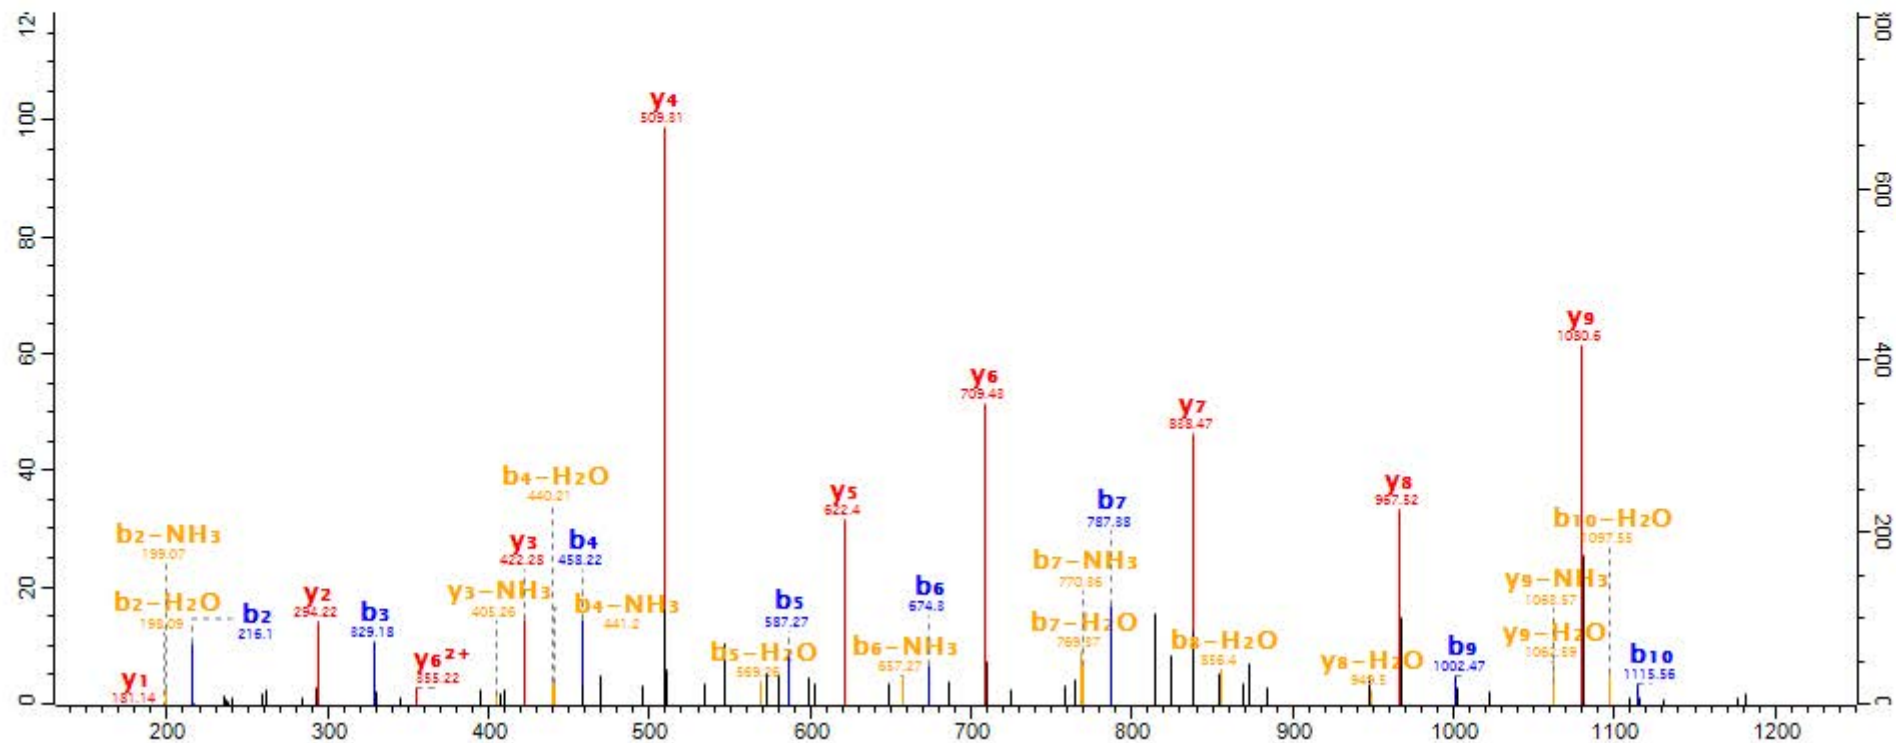

Raw file 20140820\_KT\_KerProt\_ECM\_2\_84 Scan 5923 Method ITMS; CID 136.5 Mass 1192.57 Gene names CD58

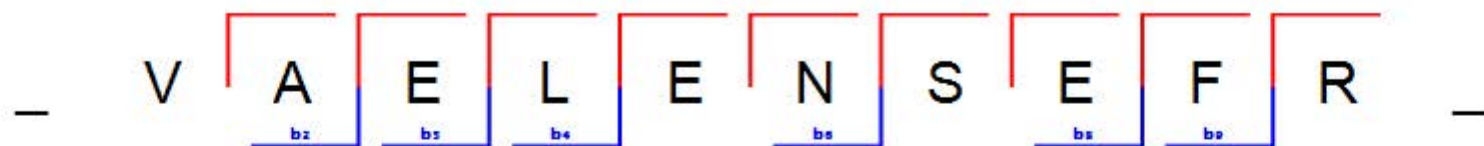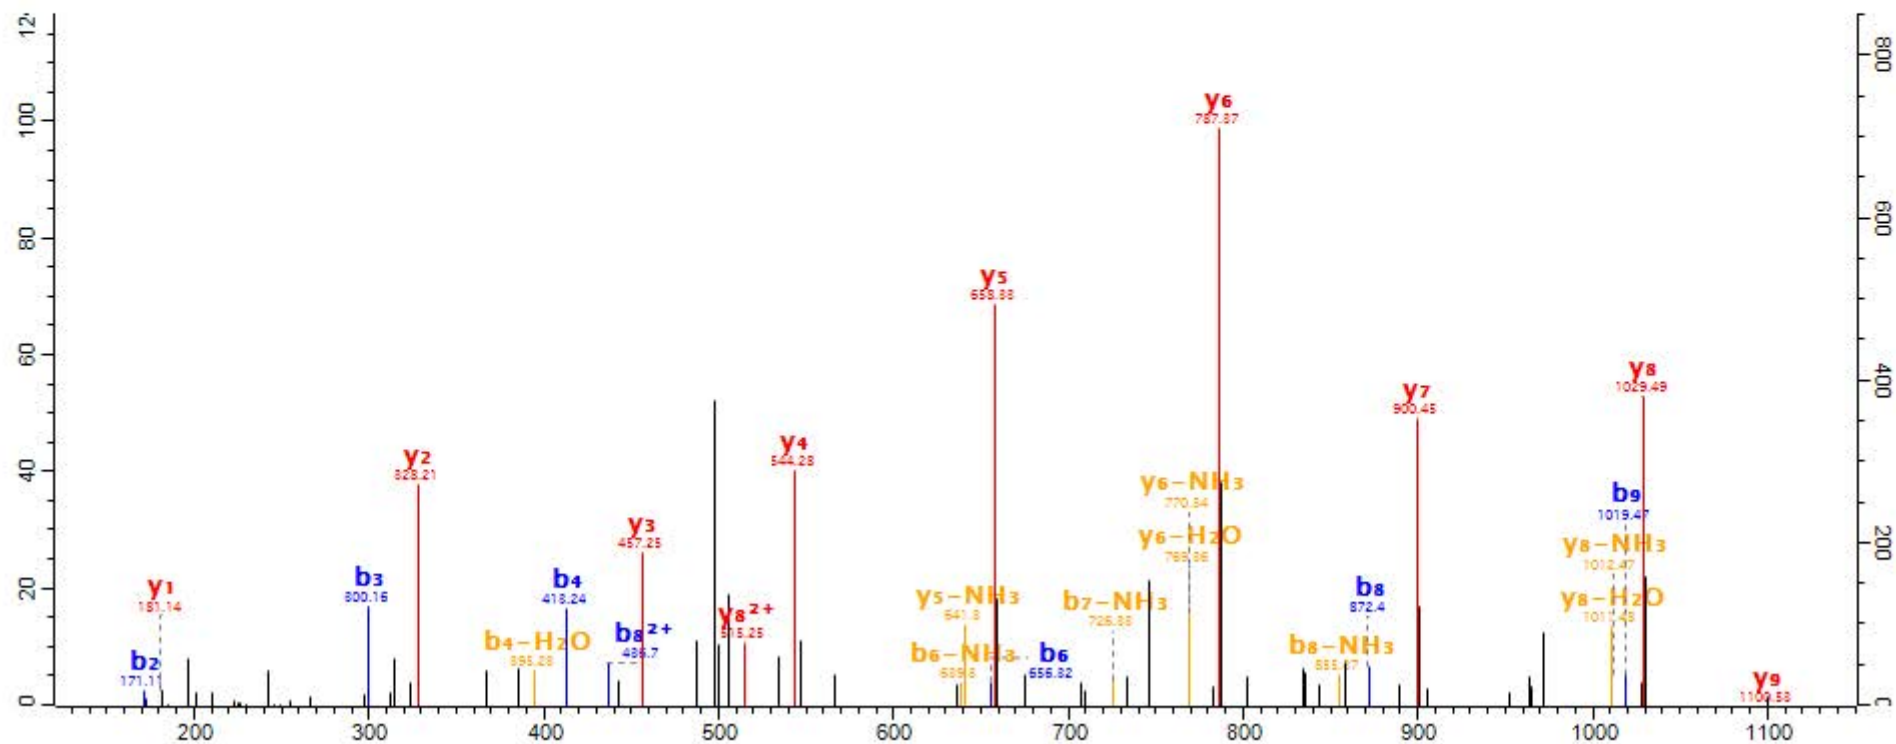



Raw file  
20140917\_KT\_KeratinocyteProteome\_ECM\_2\_04

Scan Method Score Mass Gene names  
9244 ITMS; CID 135.02 1583.82 ENDOD1

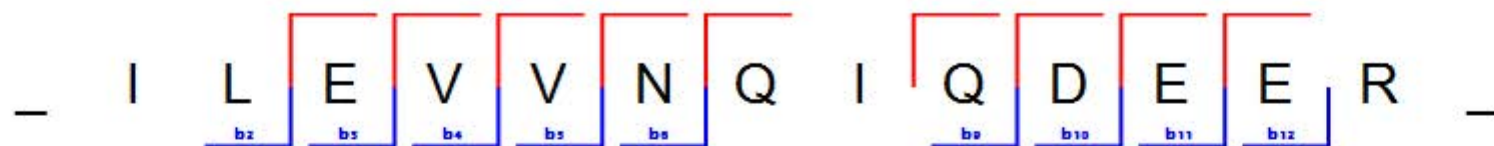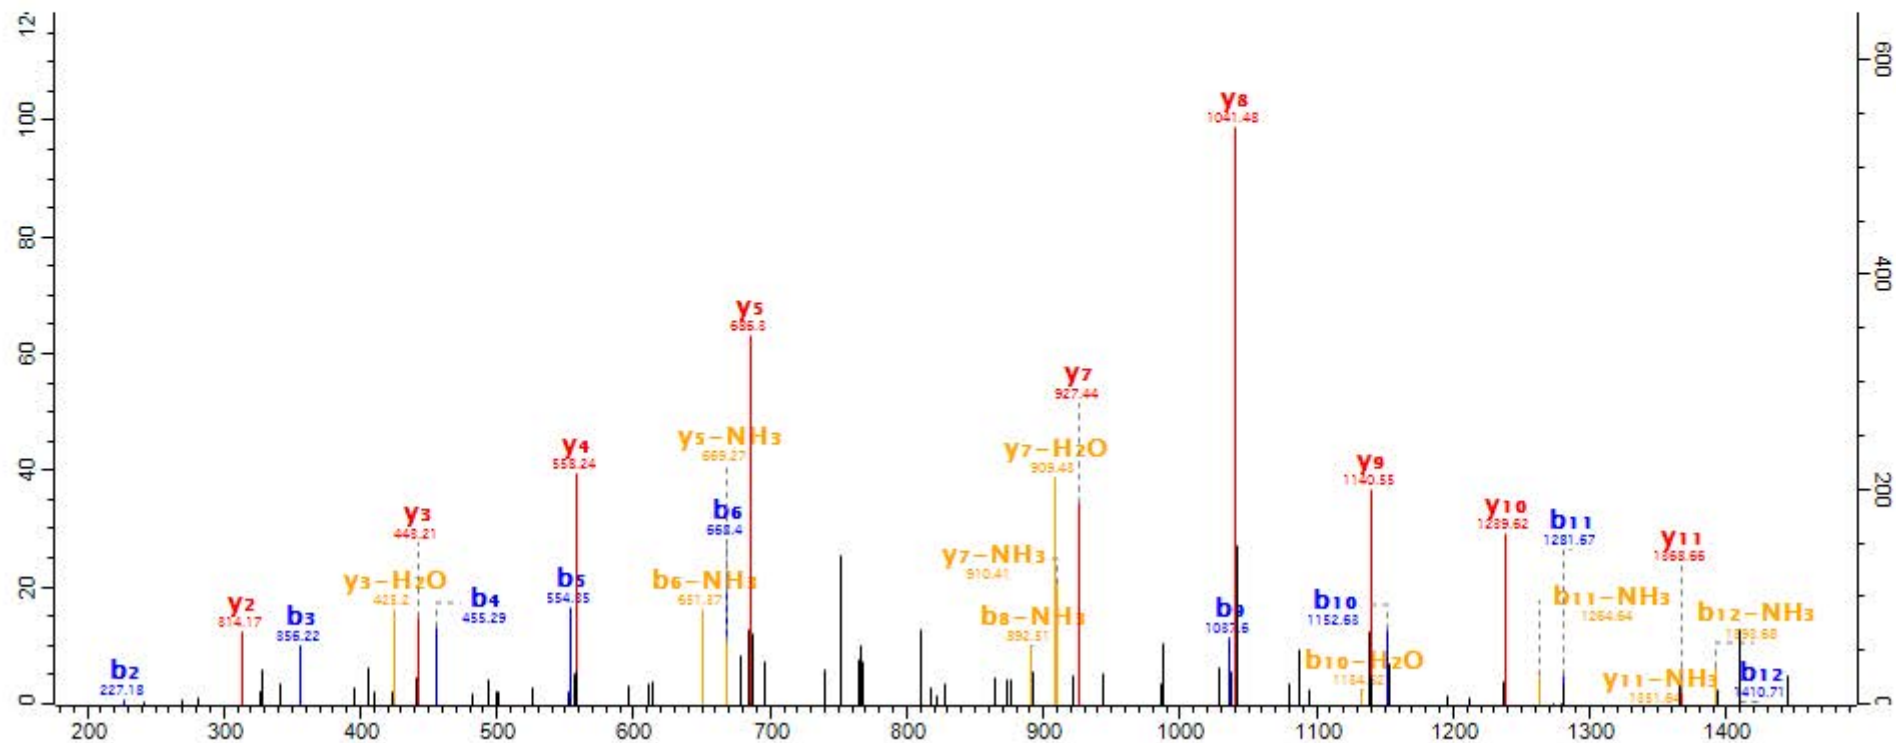

Raw file  
20140917\_KT\_KeratinocyteProteome\_ECM\_2\_09

Scan Method Score Mass Gene names  
9429 ITMS; CID 132.14 2224.11 TRY6;PRSS2;PRSS1

- L G E H N I E V L E G N E Q F I N A A K -

b5 b7 b8 b9 b10 b11<sup>2+</sup> b12<sup>2+</sup> b15 b15<sup>2+</sup> b16<sup>2+</sup> b17 b18<sup>2+</sup> b19<sup>2+</sup>

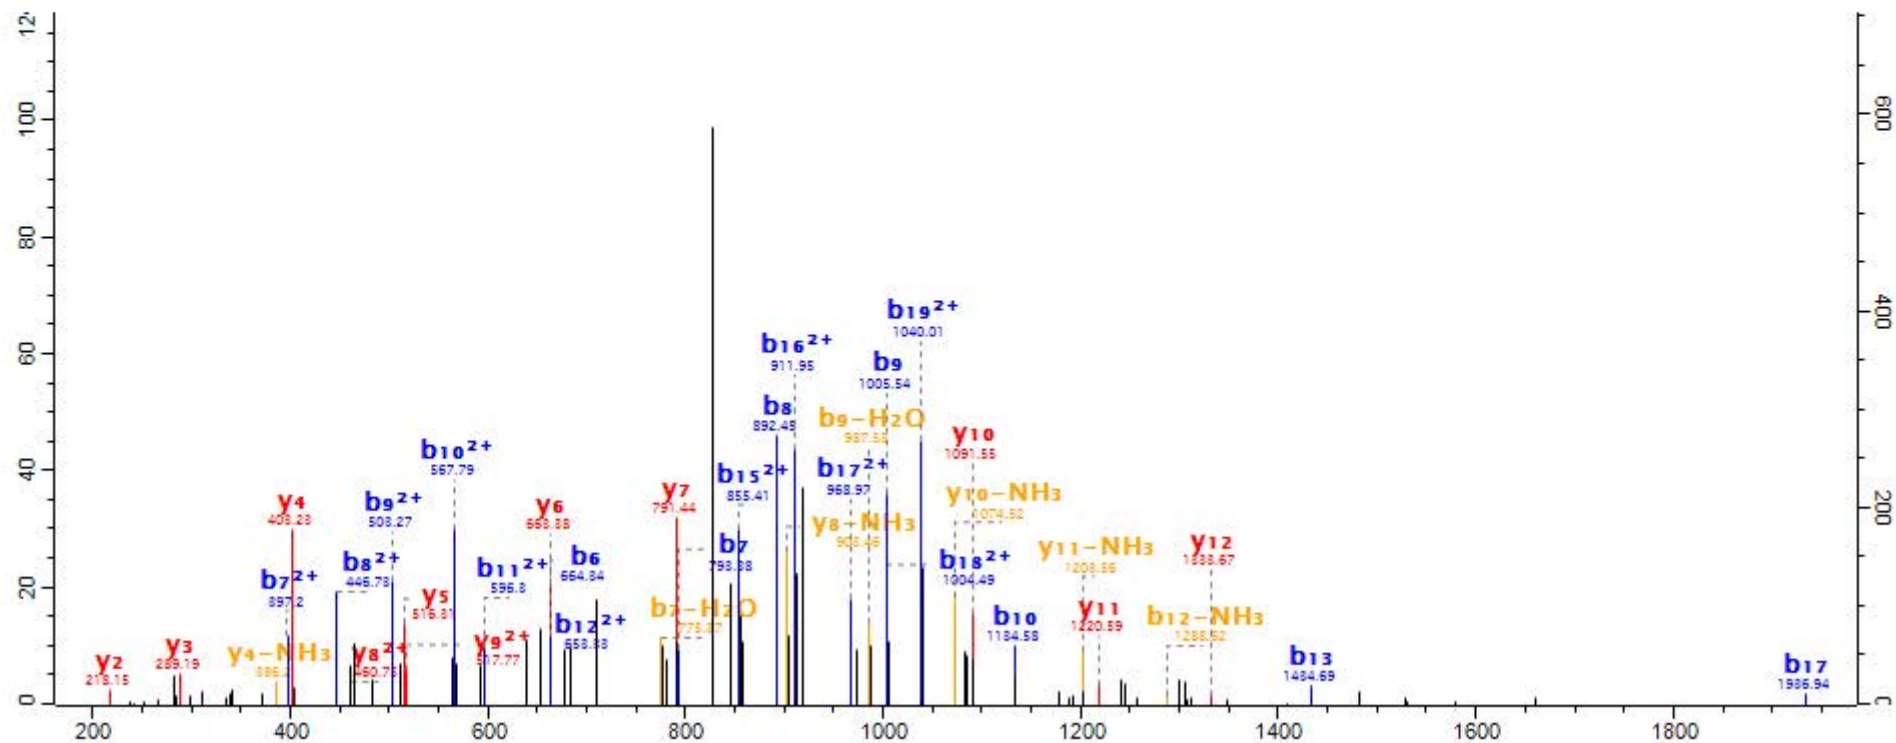

Supplement: supp_RA117.000437_133485_0_supp_17304_vyhjvq.pdf [file supp_RA117.000437_133485_0_supp_17304_vyhjvq.pdf]
