# Supplementary material
Source: PubMed Central journal article supplement (PMC5880109)
Supplement: supp_RA117.000437_133485_0_supp_17295_syhjsq.pdf [file supp_RA117.000437_133485_0_supp_17295_syhjsq.pdf]

## **Combinatorial omics analysis reveals perturbed lysosomal homeostasis in collagen VII-deficient keratinocytes**

Kerstin Thriene, Björn Andreas Grüning, Olivier Bornert, Anika Erxleben, Juna Leppert, Ioannis Athanasiou, Ekkehard Weber, Dimitra Kiritsi, Alexander Nyström, Thomas Reinheckel, Rolf Backofen, Cristina Has, Leena Bruckner-Tuderman, Jörn Dengjel

### **Supplemental Figures**

- Supplemental Figure S1: Correlation of replicates of ECM isolated from primary human keratinocytes.
- Supplemental Figure S2: PCA replicates ECM
- Supplemental Figure S3: Relative mRNA and protein abundances of laminin beta 1 and gamma 1
- Supplemental Figure S4: Gene expression analysis of keratin-encoding genes.
- Supplemental Figure S5: Network analysis of significantly regulated intracellular proteins.
- Supplemental Figure S6: Spontaneous restoration of *COL7A1* expression in skin of a DEB patient

**Supplemental Figure S1: Correlation of replicates of ECM isolated from primary human keratinocytes.**

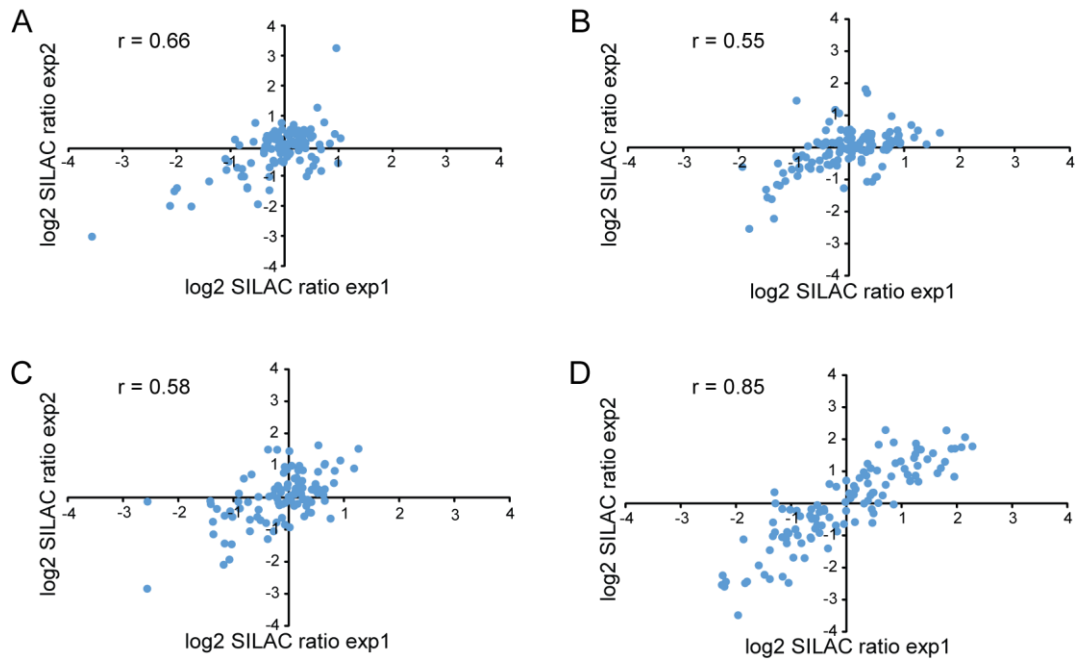

Correlation of biological replicates of the ECM proteome isolated of primary human DEB keratinocytes (A, B) or healthy controls (C, D),  $r$  = Pearson correlation coefficient.

**Supplemental Figure S2: PCA replicates ECM**

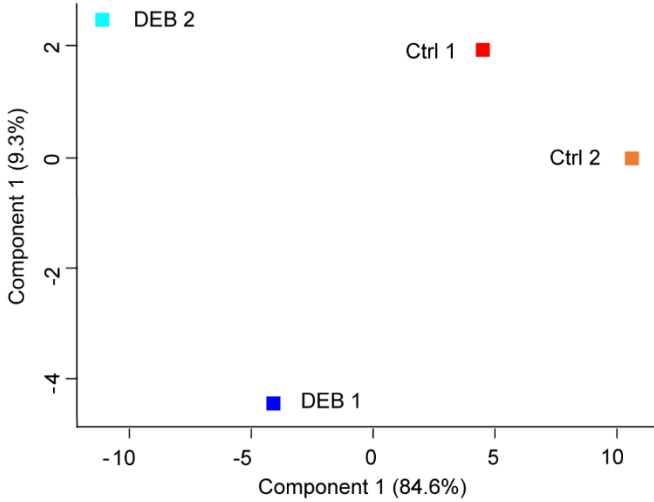

Principle component analysis (PCA) of combined SILAC ratios for each patient and the respective controls.

### Supplemental Figure S3: Relative mRNA and protein abundances of laminin beta 1 and gamma 1

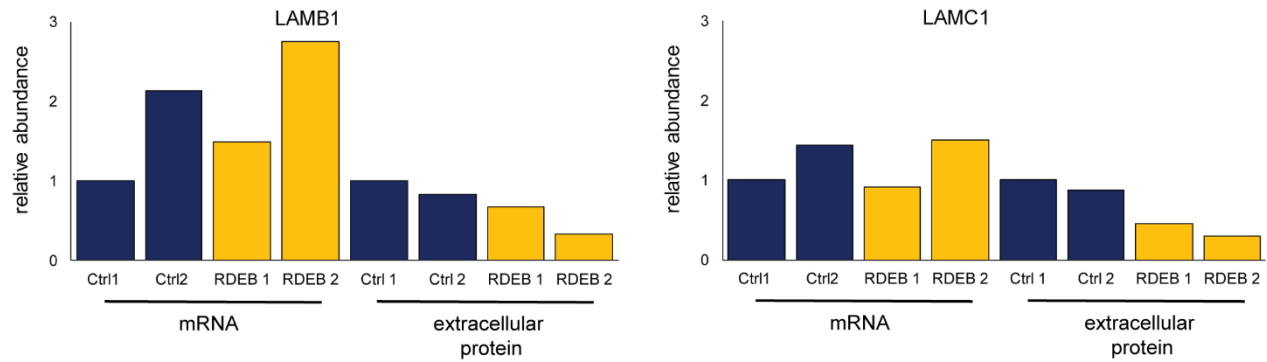

Relative values compared to the respective control 1 (Ctrl 1) are shown. Protein levels were significantly reduced (Welch's t-test, Permutation-based FDR 0.05) in ECM isolated of DEB cells compared to controls while mRNA levels did not change significantly.

**Supplemental Figure S4: Gene expression analysis of keratin-encoding genes.**

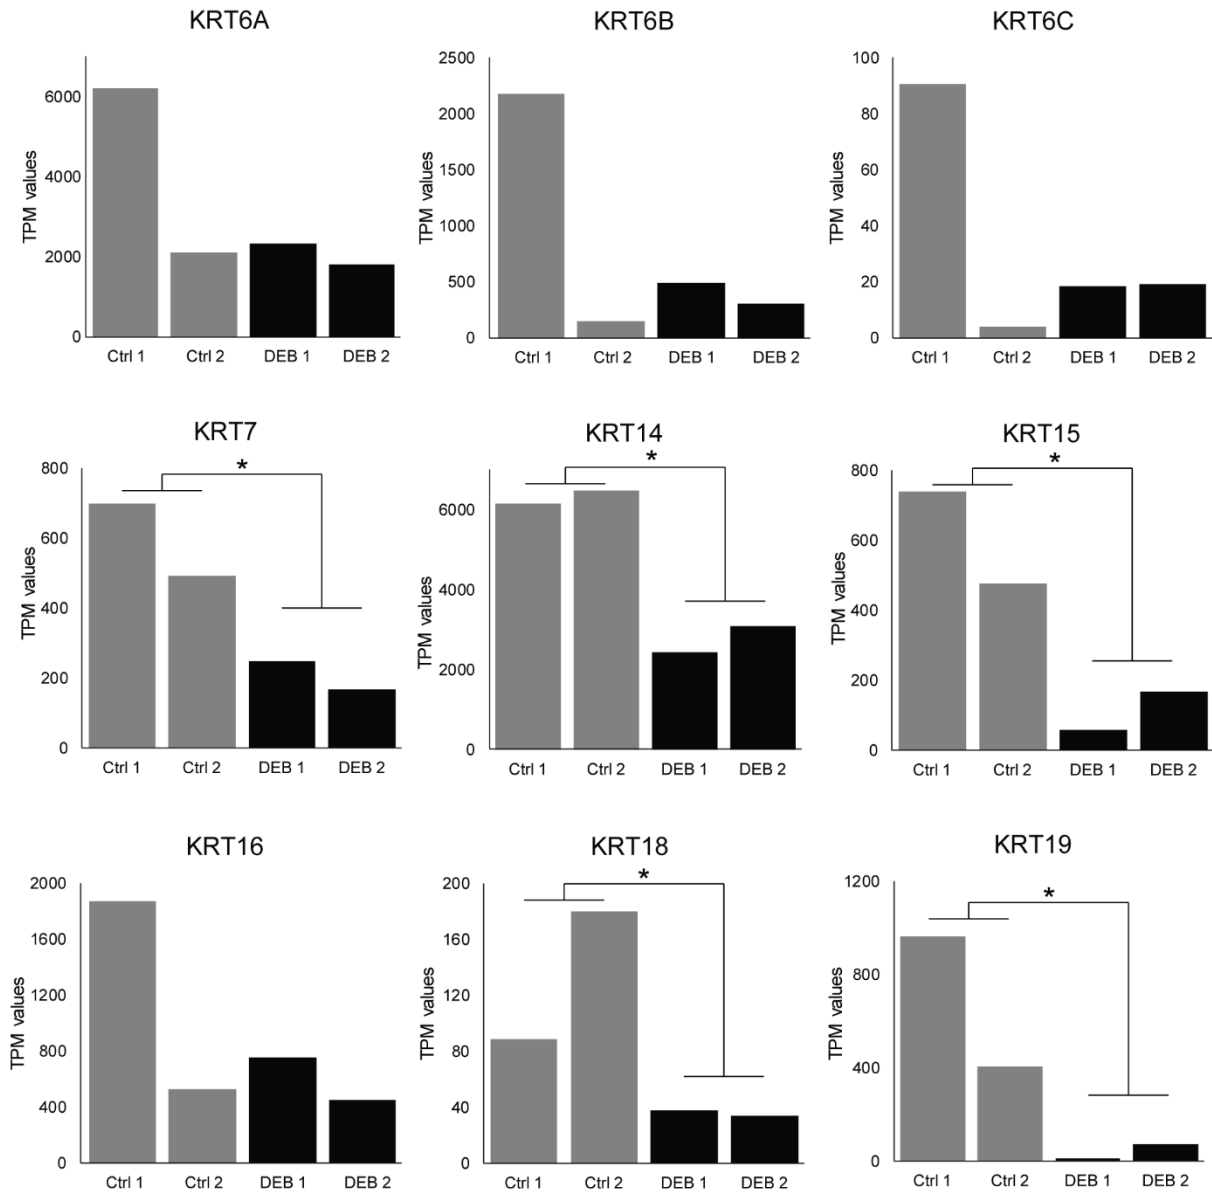

Gene expression analysis of keratin encoding genes. Bar graphs show transcript abundances (TPM values). \*: BH-corrected q-value < 0.1.

**Supplemental Figure S5: Network analysis of significantly regulated intracellular proteins.**

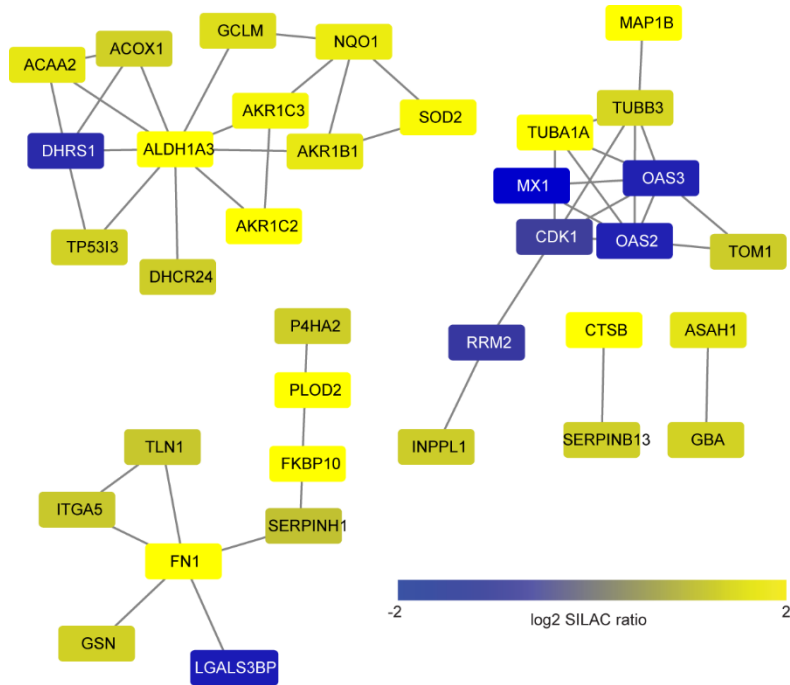

STRING DB was used to identify protein-protein interactions of significantly regulated proteins (confidence score 0.4; Welch's t-test, Permutation-based FDR 0.05, minimal fold change > +/- 2). Color scale indicates log2 transformed SILAC ratios of respective proteins.

**Supplemental Figure S6: Spontaneous restoration of *COL7A1* expression in skin of a DEB patient**

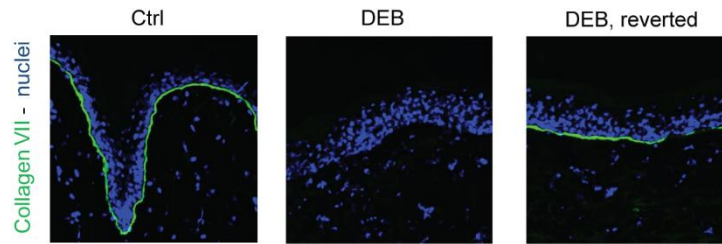

Immunofluorescence staining of DEB skin reveals spontaneously restored C7 levels (green signal). Blue = DAPI staining.
